# Supplementary material for: The potential of shifting recombination hotspots to increase genetic gain in livestock breeding
Source: Genet Sel Evol. 2017 Jul 4;49:55. doi: 10.1186/s12711-017-0330-5 (PMC5496647; doi:10.1186/s12711-017-0330-5)
Supplement: Supplementary file 1 — Additional file 1: Table S1. Mean and variance of 10 replicates across all scenarios.This file presents the data used for plotting the mean and variance across each replicate for each scenario for the 80 generations of selection. [file 12711_2017_330_MOESM1_ESM.xlsx]

## Sheet: Sheet1
Scenario	Number of Chromosome Regions	Shift Recombination Locations in Generation 0	Generation	Mean Genetic Variance (10 Reps)	Variance Genetic Variance (10 Reps)	Mean Genic Variance (10 Reps)	Variance Genic Variance (10 Reps)	Mean Genetic Gain (10 Reps)	Variance Genetic Gain (10 Reps)
1	250	No	1	1	0	1	0	0	0
1	250	No	2	0.950879	0.00310289	0.9727	6.34417e-05	1.00114	0.00131858
1	250	No	3	0.898378	0.00399375	0.945591	7.95892e-05	1.97505	0.00592903
1	250	No	4	0.835453	0.00526846	0.919585	9.71141e-05	2.92324	0.00961064
1	250	No	5	0.778873	0.00481593	0.89576	0.000194625	3.8413	0.0164814
1	250	No	6	0.727944	0.00570032	0.870493	0.000302478	4.75078	0.0374248
1	250	No	7	0.686085	0.00438809	0.846037	0.000427649	5.63751	0.0621511
1	250	No	8	0.665075	0.00449389	0.821117	0.000566091	6.47921	0.0742148
1	250	No	9	0.631185	0.00480635	0.797586	0.000753351	7.29802	0.106874
1	250	No	10	0.613712	0.0030287	0.77295	0.000859512	8.09403	0.156399
1	250	No	11	0.560072	0.00267865	0.748215	0.00106611	8.87784	0.193118
1	250	No	12	0.550319	0.0050853	0.725353	0.0011833	9.63396	0.228151
1	250	No	13	0.519721	0.00441445	0.701936	0.00130851	10.3807	0.277588
1	250	No	14	0.481185	0.00457419	0.678745	0.00149811	11.0988	0.340602
1	250	No	15	0.457748	0.00444279	0.656227	0.0016393	11.7896	0.371253
1	250	No	16	0.424911	0.00329174	0.633053	0.00178683	12.4566	0.42235
1	250	No	17	0.396449	0.00251349	0.610431	0.00182055	13.1267	0.476643
1	250	No	18	0.384085	0.00319978	0.588768	0.00185713	13.781	0.523623
1	250	No	19	0.353907	0.00217561	0.5682	0.00167385	14.4266	0.55652
1	250	No	20	0.336278	0.00277023	0.547105	0.00181839	15.026	0.621466
1	250	No	21	0.320679	0.00251952	0.529404	0.0017145	15.6162	0.651931
1	250	No	22	0.30986	0.00200016	0.508594	0.00166849	16.2002	0.703753
1	250	No	23	0.282379	0.00165773	0.490888	0.00146101	16.7589	0.73781
1	250	No	24	0.259556	0.00225598	0.470851	0.00134814	17.304	0.790118
1	250	No	25	0.240971	0.00145395	0.454026	0.0012296	17.8135	0.857465
1	250	No	26	0.240397	0.00166397	0.437578	0.00119113	18.3192	0.940804
1	250	No	27	0.220717	0.00125862	0.420919	0.00106826	18.8211	1.01997
1	250	No	28	0.201337	0.00143853	0.404591	0.00104943	19.297	1.08581
1	250	No	29	0.188183	0.00081474	0.387551	0.000997859	19.7478	1.12423
1	250	No	30	0.179683	0.000286897	0.372236	0.000840916	20.1715	1.16911
1	250	No	31	0.163632	0.000340694	0.35546	0.000829687	20.5969	1.21336
1	250	No	32	0.156956	0.000516262	0.341622	0.000729976	20.9979	1.25017
1	250	No	33	0.143846	0.000381316	0.328266	0.000615295	21.3902	1.26588
1	250	No	34	0.133064	0.000227815	0.315706	0.000544765	21.7664	1.27543
1	250	No	35	0.123899	0.000190699	0.302424	0.000499792	22.137	1.29547
1	250	No	36	0.113492	0.000221603	0.288753	0.000468687	22.5061	1.31941
1	250	No	37	0.109558	0.00031212	0.276946	0.000455293	22.8431	1.35483
1	250	No	38	0.102282	0.000188948	0.265771	0.000445654	23.1682	1.39515
1	250	No	39	0.0957757	0.000129384	0.256705	0.000413071	23.4966	1.40985
1	250	No	40	0.0876562	9.71168e-05	0.2456	0.000419129	23.8115	1.42358
1	250	No	41	0.0819262	8.17075e-05	0.237511	0.000447147	24.1141	1.45006
1	250	No	42	0.0781462	3.11954e-05	0.228522	0.000416797	24.3945	1.46218
1	250	No	43	0.0746618	4.73465e-05	0.220562	0.000370238	24.6777	1.4955
1	250	No	44	0.0703576	4.3956e-05	0.213379	0.000374256	24.9435	1.51625
1	250	No	45	0.0660194	5.78888e-05	0.205428	0.000322353	25.2131	1.55526
1	250	No	46	0.0618325	3.97386e-05	0.196767	0.00026069	25.4776	1.55944
1	250	No	47	0.0596493	4.04562e-05	0.189404	0.000282869	25.7291	1.55687
1	250	No	48	0.0549345	4.3708e-05	0.18175	0.000266773	25.9725	1.55767
1	250	No	49	0.0523603	5.18016e-05	0.173518	0.000215344	26.2125	1.56238
1	250	No	50	0.0504342	5.12934e-05	0.166631	0.000218451	26.4397	1.56755
1	250	No	51	0.0469968	2.92745e-05	0.158095	0.000232769	26.6668	1.57817
1	250	No	52	0.0425378	4.58829e-05	0.150617	0.000201866	26.8891	1.5966
1	250	No	53	0.0414946	4.39476e-05	0.144448	0.000202744	27.0933	1.62578
1	250	No	54	0.039605	4.28764e-05	0.138002	0.000183293	27.2982	1.63664
1	250	No	55	0.0371805	4.37609e-05	0.131878	0.000157124	27.5049	1.66314
1	250	No	56	0.0335849	3.63409e-05	0.124188	0.000180924	27.7045	1.68392
1	250	No	57	0.0309999	3.03256e-05	0.119066	0.000208842	27.8861	1.73608
1	250	No	58	0.0304872	3.50113e-05	0.113465	0.00022279	28.0593	1.76677
1	250	No	59	0.0277177	2.52064e-05	0.107653	0.00021231	28.2352	1.78875
1	250	No	60	0.0260675	2.27461e-05	0.101854	0.000230767	28.4009	1.82066
1	250	No	61	0.0237704	1.54051e-05	0.0970242	0.000227958	28.565	1.85025
1	250	No	62	0.0224468	1.65741e-05	0.0913673	0.000250482	28.7195	1.86744
1	250	No	63	0.0201882	8.5281e-06	0.0852399	0.000249277	28.8755	1.89885
1	250	No	64	0.0186204	1.30057e-05	0.0799417	0.000233158	29.019	1.92465
1	250	No	65	0.0178783	1.40752e-05	0.0758978	0.000227163	29.1556	1.95596
1	250	No	66	0.0161997	1.42706e-05	0.0722361	0.000211423	29.2873	1.96173
1	250	No	67	0.0149768	1.12514e-05	0.0694323	0.00018884	29.4165	1.97004
1	250	No	68	0.0141011	1.02718e-05	0.0657141	0.000174552	29.5428	1.9994
1	250	No	69	0.0135189	1.19555e-05	0.0628053	0.000174723	29.6617	2.01939
1	250	No	70	0.0121362	8.85601e-06	0.0599333	0.000166187	29.7782	2.03825
1	250	No	71	0.0110597	7.79575e-06	0.0572218	0.00015578	29.888	2.06459
1	250	No	72	0.0104704	7.21937e-06	0.0546915	0.000154732	29.9913	2.08164
1	250	No	73	0.00939605	4.77192e-06	0.0530688	0.00015095	30.0902	2.1045
1	250	No	74	0.00847026	3.19775e-06	0.0528104	0.000158402	30.1846	2.12568
1	250	No	75	0.00823643	2.61427e-06	0.0511007	0.000142841	30.2762	2.13998
1	250	No	76	0.00745096	2.36525e-06	0.0489027	0.000129057	30.3681	2.15169
1	250	No	77	0.00686273	1.88907e-06	0.0468961	0.000118269	30.4553	2.16431
1	250	No	78	0.0061339	1.20328e-06	0.0444672	9.58771e-05	30.5386	2.18438
1	250	No	79	0.00562007	1.09216e-06	0.0427022	9.62278e-05	30.6155	2.20879
1	250	No	80	0.00516918	9.64458e-07	0.0409977	8.12493e-05	30.6897	2.22235
1	250	No	81	0.0048361	9.12936e-07	0.0389287	7.23087e-05	30.7595	2.23305
1	250	Yes	1	1	0	1	0	0	0
1	250	Yes	2	0.965737	0.00360851	0.97221	5.18328e-05	1.0009	0.00230296
1	250	Yes	3	0.908316	0.00636466	0.944948	6.91084e-05	1.99715	0.00704391
1	250	Yes	4	0.887496	0.00348106	0.920064	9.7885e-05	2.95501	0.015335
1	250	Yes	5	0.810627	0.00118422	0.894294	0.000130024	3.90784	0.0191311
1	250	Yes	6	0.772877	0.00368404	0.868801	0.000176347	4.81294	0.0369997
1	250	Yes	7	0.774902	0.00240549	0.845799	0.000293859	5.69483	0.0503723
1	250	Yes	8	0.73628	0.00360419	0.824229	0.000336667	6.58946	0.0634131
1	250	Yes	9	0.711361	0.00553823	0.800827	0.00047144	7.46023	0.081619
1	250	Yes	10	0.709008	0.00431378	0.777936	0.000521554	8.33049	0.0901943
1	250	Yes	11	0.673806	0.00507174	0.757482	0.000631751	9.17585	0.10678
1	250	Yes	12	0.660685	0.00379312	0.737252	0.000656765	9.9921	0.133972
1	250	Yes	13	0.622733	0.00470365	0.715581	0.000845518	10.8294	0.163327
1	250	Yes	14	0.625443	0.00616647	0.696538	0.00103098	11.6326	0.205356
1	250	Yes	15	0.607541	0.00615589	0.6769	0.00114721	12.4347	0.23401
1	250	Yes	16	0.573131	0.00422572	0.659214	0.00115265	13.1839	0.274292
1	250	Yes	17	0.563355	0.00342428	0.641961	0.00121796	13.9631	0.306288
1	250	Yes	18	0.537802	0.0020666	0.626309	0.00120779	14.705	0.34798
1	250	Yes	19	0.510066	0.00322163	0.609804	0.00121473	15.4547	0.380716
1	250	Yes	20	0.480558	0.00310879	0.595536	0.00109056	16.1677	0.441083
1	250	Yes	21	0.463526	0.00171515	0.580515	0.00114802	16.8608	0.459514
1	250	Yes	22	0.442236	0.000953728	0.56647	0.00108609	17.5434	0.470259
1	250	Yes	23	0.433822	0.000807193	0.551221	0.00114194	18.2143	0.486187
1	250	Yes	24	0.411596	0.00102075	0.535521	0.00120815	18.8866	0.478106
1	250	Yes	25	0.395535	0.00210731	0.520192	0.00127928	19.5557	0.517974
1	250	Yes	26	0.381523	0.00206275	0.505193	0.00135567	20.1851	0.536005
1	250	Yes	27	0.361596	0.00137963	0.49062	0.00131608	20.8093	0.507972
1	250	Yes	28	0.355331	0.00120388	0.476113	0.00135823	21.4246	0.540049
1	250	Yes	29	0.343302	0.000772692	0.461995	0.00141736	22.0303	0.562078
1	250	Yes	30	0.316476	0.00127892	0.447449	0.00133079	22.6259	0.569722
1	250	Yes	31	0.308264	0.00117364	0.434234	0.00129968	23.1925	0.621029
1	250	Yes	32	0.285032	0.00100764	0.421007	0.00133616	23.7509	0.653306
1	250	Yes	33	0.263989	0.00114783	0.408178	0.00128162	24.2876	0.68719
1	250	Yes	34	0.256755	0.00103407	0.396233	0.00118254	24.7979	0.695254
1	250	Yes	35	0.24698	0.000879165	0.382808	0.00115771	25.3157	0.734873
1	250	Yes	36	0.24364	0.00117592	0.369971	0.0011279	25.8254	0.7977
1	250	Yes	37	0.220708	0.000853633	0.357114	0.00110901	26.3241	0.871044
1	250	Yes	38	0.214843	0.000380507	0.34586	0.0010919	26.792	0.926763
1	250	Yes	39	0.202358	0.000554544	0.334137	0.00112271	27.2561	0.978863
1	250	Yes	40	0.188998	0.000766085	0.323739	0.00109682	27.714	1.03073
1	250	Yes	41	0.177011	0.000607082	0.311598	0.00104951	28.1669	1.0966
1	250	Yes	42	0.168934	0.000535678	0.299424	0.0010568	28.5816	1.14275
1	250	Yes	43	0.15374	0.000570748	0.289021	0.0010374	29.0063	1.17033
1	250	Yes	44	0.14753	0.000598892	0.279134	0.00102778	29.3849	1.19592
1	250	Yes	45	0.139093	0.000575171	0.268612	0.00107676	29.7676	1.24061
1	250	Yes	46	0.128434	0.000399789	0.258898	0.000959808	30.1481	1.29785
1	250	Yes	47	0.123904	0.000486859	0.249553	0.000884145	30.509	1.34065
1	250	Yes	48	0.11621	0.000678649	0.240381	0.000797454	30.8613	1.4077
1	250	Yes	49	0.112957	0.000549089	0.232521	0.000773573	31.2072	1.48883
1	250	Yes	50	0.105229	0.000477084	0.224635	0.0006979	31.5457	1.51999
1	250	Yes	51	0.0982747	0.000417477	0.215869	0.00062864	31.8646	1.5837
1	250	Yes	52	0.0943456	0.00039233	0.206912	0.00061235	32.1819	1.62805
1	250	Yes	53	0.0894058	0.000325187	0.19862	0.000662964	32.4926	1.69511
1	250	Yes	54	0.080281	0.000279354	0.190627	0.000625481	32.7911	1.77148
1	250	Yes	55	0.0755273	0.000233389	0.182238	0.000552744	33.0699	1.81993
1	250	Yes	56	0.0706396	0.000224471	0.173444	0.000504983	33.3474	1.87988
1	250	Yes	57	0.0673278	0.000168675	0.166314	0.000427441	33.61	1.92658
1	250	Yes	58	0.0597871	0.000126424	0.158816	0.000373876	33.8648	1.95203
1	250	Yes	59	0.0551672	9.23339e-05	0.152293	0.000371578	34.1062	1.98766
1	250	Yes	60	0.0511434	0.000104986	0.14519	0.000361992	34.3427	2.01484
1	250	Yes	61	0.0494261	0.000111193	0.138237	0.000369035	34.5719	2.04012
1	250	Yes	62	0.0450805	9.36316e-05	0.132188	0.00035587	34.7873	2.07037
1	250	Yes	63	0.0407045	8.37498e-05	0.125549	0.000323286	34.9982	2.09059
1	250	Yes	64	0.0385127	9.40896e-05	0.119786	0.000301122	35.2018	2.11173
1	250	Yes	65	0.0347528	8.14934e-05	0.114368	0.000277522	35.3948	2.14751
1	250	Yes	66	0.0334157	7.90004e-05	0.109459	0.000217116	35.5855	2.18025
1	250	Yes	67	0.030579	4.74508e-05	0.104835	0.000211313	35.7692	2.19898
1	250	Yes	68	0.0281339	4.0262e-05	0.100097	0.000216779	35.9418	2.23205
1	250	Yes	69	0.025831	4.05141e-05	0.0956727	0.00024355	36.1103	2.26072
1	250	Yes	70	0.0239655	3.70724e-05	0.0914332	0.000234074	36.2733	2.29324
1	250	Yes	71	0.0221394	2.71234e-05	0.0868025	0.000210627	36.4306	2.31667
1	250	Yes	72	0.0207762	2.75989e-05	0.0822442	0.00021971	36.5799	2.34612
1	250	Yes	73	0.019233	1.81594e-05	0.0785081	0.000202438	36.7224	2.36276
1	250	Yes	74	0.0181224	2.07954e-05	0.0748147	0.00018554	36.8597	2.3783
1	250	Yes	75	0.0165979	1.43173e-05	0.0709271	0.000181686	36.9965	2.40642
1	250	Yes	76	0.0148973	1.32641e-05	0.0669616	0.000168913	37.1257	2.42592
1	250	Yes	77	0.0135268	1.06171e-05	0.0634086	0.000126394	37.2502	2.44683
1	250	Yes	78	0.0122598	1.02551e-05	0.0604059	0.000109686	37.3712	2.46693
1	250	Yes	79	0.0115297	1.06036e-05	0.0571027	9.26303e-05	37.4788	2.49235
1	250	Yes	80	0.0104966	1.01181e-05	0.0539292	8.5271e-05	37.5861	2.51904
1	250	Yes	81	0.00953787	1.20623e-05	0.0513505	7.27404e-05	37.6857	2.53664
1	500	No	1	1	0	1	0	0	0
1	500	No	2	0.965333	0.00241224	0.977433	1.0465e-05	0.974886	0.00253863
1	500	No	3	0.909411	0.00371102	0.951124	1.85119e-05	1.97873	0.00519906
1	500	No	4	0.893195	0.0115507	0.927286	4.44224e-05	2.94892	0.00629456
1	500	No	5	0.830379	0.00465648	0.905476	8.47022e-05	3.90389	0.0193195
1	500	No	6	0.75084	0.00169893	0.881719	6.90392e-05	4.83962	0.0163771
1	500	No	7	0.719829	0.00375885	0.859864	0.000156353	5.72857	0.0235456
1	500	No	8	0.712432	0.00758012	0.837385	0.000194224	6.60585	0.0231008
1	500	No	9	0.667816	0.00834627	0.813605	0.000190275	7.45555	0.0423788
1	500	No	10	0.629811	0.00491583	0.793566	0.000218985	8.2792	0.0525961
1	500	No	11	0.599651	0.00449623	0.772879	0.000226533	9.08192	0.0779787
1	500	No	12	0.568229	0.00664723	0.753608	0.000174088	9.85611	0.0941186
1	500	No	13	0.557907	0.00569214	0.734295	0.000194905	10.6226	0.112404
1	500	No	14	0.524856	0.00489988	0.713647	0.000244918	11.3878	0.136628
1	500	No	15	0.500469	0.00439749	0.693957	0.000264886	12.1179	0.176992
1	500	No	16	0.516553	0.0043156	0.673802	0.000304707	12.8234	0.223404
1	500	No	17	0.471771	0.00484653	0.65245	0.000368266	13.5658	0.230717
1	500	No	18	0.440448	0.00325934	0.632613	0.000402812	14.2469	0.288792
1	500	No	19	0.42411	0.0029362	0.613519	0.000439712	14.9194	0.310682
1	500	No	20	0.383829	0.00279618	0.593634	0.000468483	15.5734	0.359901
1	500	No	21	0.383181	0.00309488	0.575139	0.000516929	16.2042	0.409517
1	500	No	22	0.35685	0.00222051	0.556806	0.000455383	16.8221	0.452376
1	500	No	23	0.339049	0.002691	0.540904	0.000441944	17.4147	0.504709
1	500	No	24	0.325279	0.0025873	0.524543	0.000419305	18.0017	0.57068
1	500	No	25	0.310177	0.00320305	0.508168	0.000420155	18.5798	0.635544
1	500	No	26	0.28556	0.00153532	0.493694	0.000389864	19.1357	0.683763
1	500	No	27	0.27513	0.00165958	0.477641	0.000339262	19.6716	0.758044
1	500	No	28	0.255203	0.00118404	0.461896	0.000341391	20.1932	0.83569
1	500	No	29	0.247061	0.00134523	0.447816	0.00037329	20.7025	0.876657
1	500	No	30	0.23713	0.00137555	0.433951	0.00042275	21.1919	0.948171
1	500	No	31	0.220256	0.00120512	0.419002	0.000400387	21.6824	0.994288
1	500	No	32	0.208097	0.00163218	0.40463	0.000426205	22.1616	1.03669
1	500	No	33	0.202115	0.00130861	0.391401	0.000387849	22.6256	1.09166
1	500	No	34	0.188837	0.00103693	0.379708	0.000405405	23.0693	1.1166
1	500	No	35	0.175393	0.000799919	0.364672	0.000434046	23.5258	1.16655
1	500	No	36	0.161086	0.000750448	0.351262	0.000438247	23.9515	1.2033
1	500	No	37	0.156904	0.000633435	0.338428	0.000442248	24.3571	1.26809
1	500	No	38	0.150549	0.000823211	0.326548	0.000445471	24.7571	1.32495
1	500	No	39	0.141639	0.000778926	0.315901	0.000463313	25.1551	1.35919
1	500	No	40	0.13618	0.000611737	0.305227	0.000442323	25.534	1.40373
1	500	No	41	0.126246	0.00067476	0.294457	0.000405412	25.9152	1.45082
1	500	No	42	0.122786	0.000668434	0.286144	0.000367009	26.2676	1.5205
1	500	No	43	0.113079	0.000370467	0.274478	0.000315828	26.6238	1.58287
1	500	No	44	0.107848	0.000370117	0.26437	0.000279791	26.958	1.63925
1	500	No	45	0.100839	0.000298141	0.254832	0.000219895	27.2802	1.70549
1	500	No	46	0.0955269	0.000282074	0.246224	0.000179098	27.6002	1.77198
1	500	No	47	0.0930357	0.000256369	0.238094	0.00017775	27.9109	1.80856
1	500	No	48	0.0863426	0.000280669	0.22891	0.000171832	28.2154	1.88209
1	500	No	49	0.0817655	0.000159443	0.220078	0.000148811	28.5037	1.9268
1	500	No	50	0.0792943	9.68589e-05	0.210395	0.000163997	28.7867	1.94078
1	500	No	51	0.0724416	6.3751e-05	0.203134	0.00017348	29.0592	1.9798
1	500	No	52	0.0709975	5.18395e-05	0.19651	0.000167662	29.3358	2.00987
1	500	No	53	0.065213	1.91031e-05	0.189077	0.000157154	29.6057	2.02331
1	500	No	54	0.0600507	2.78573e-05	0.181508	0.00018887	29.8595	2.02208
1	500	No	55	0.057283	2.66814e-05	0.17511	0.000177807	30.1036	2.01941
1	500	No	56	0.0517146	1.86066e-05	0.167846	0.000177041	30.3372	2.04496
1	500	No	57	0.0502078	2.32555e-05	0.160658	0.000213492	30.5678	2.06143
1	500	No	58	0.0467473	1.53749e-05	0.153696	0.000218501	30.7866	2.05529
1	500	No	59	0.0439065	2.45899e-05	0.147731	0.000227647	31.0085	2.07002
1	500	No	60	0.0428358	3.18848e-05	0.141674	0.000227135	31.2172	2.08577
1	500	No	61	0.0401374	3.06595e-05	0.136128	0.000223869	31.43	2.08111
1	500	No	62	0.0374154	2.60797e-05	0.130156	0.000236184	31.6253	2.08119
1	500	No	63	0.0341945	2.90835e-05	0.124482	0.000232212	31.8219	2.08001
1	500	No	64	0.0315006	3.40067e-05	0.118625	0.000206192	32.0113	2.06661
1	500	No	65	0.0303357	2.11457e-05	0.113181	0.000188355	32.1871	2.05652
1	500	No	66	0.028774	2.20225e-05	0.108557	0.000157534	32.3578	2.05892
1	500	No	67	0.0264608	1.90464e-05	0.103751	0.000151042	32.5257	2.04338
1	500	No	68	0.0245217	1.37665e-05	0.100607	0.000140235	32.688	2.0282
1	500	No	69	0.0230007	1.29123e-05	0.0963068	0.000122812	32.8429	2.01675
1	500	No	70	0.0225945	1.58571e-05	0.0928584	0.000123004	32.9954	1.99844
1	500	No	71	0.0209568	1.56823e-05	0.0892019	0.000122656	33.1467	1.9824
1	500	No	72	0.0197365	1.88418e-05	0.0858424	0.000104274	33.2888	1.97406
1	500	No	73	0.0187874	1.24159e-05	0.0819974	0.000104541	33.4286	1.9676
1	500	No	74	0.0177956	9.29907e-06	0.0780494	0.000100029	33.565	1.96511
1	500	No	75	0.016688	8.23966e-06	0.0745048	8.71525e-05	33.6985	1.95429
1	500	No	76	0.0150175	6.64425e-06	0.0706626	7.58763e-05	33.8302	1.93237
1	500	No	77	0.0139164	5.26076e-06	0.067308	6.66983e-05	33.9513	1.92325
1	500	No	78	0.0128358	3.66098e-06	0.064294	7.38373e-05	34.0678	1.92555
1	500	No	79	0.0119271	2.65776e-06	0.0621092	7.31614e-05	34.1799	1.92387
1	500	No	80	0.0109355	2.75419e-06	0.0595909	6.99516e-05	34.2873	1.91687
1	500	No	81	0.00999956	2.47502e-06	0.0571498	6.07778e-05	34.3926	1.91556
1	500	Yes	1	1	0	1	0	0	0
1	500	Yes	2	0.969677	0.0030474	0.977017	1.31585e-05	0.975617	0.00213021
1	500	Yes	3	0.916303	0.00380265	0.952013	3.37294e-05	1.9347	0.00821969
1	500	Yes	4	0.877724	0.00527785	0.926997	9.83572e-05	2.93082	0.0218506
1	500	Yes	5	0.825914	0.0063042	0.904455	0.000141306	3.87258	0.0348285
1	500	Yes	6	0.789962	0.00343927	0.881269	0.000175442	4.80614	0.0621204
1	500	Yes	7	0.750511	0.00532833	0.857442	0.000208819	5.7272	0.0710292
1	500	Yes	8	0.714317	0.00285853	0.834577	0.000279327	6.61752	0.0766279
1	500	Yes	9	0.673716	0.001907	0.812165	0.000410985	7.48139	0.0929144
1	500	Yes	10	0.645567	0.00391535	0.791576	0.000418099	8.30869	0.10195
1	500	Yes	11	0.640658	0.00574173	0.771783	0.0003601	9.12629	0.12226
1	500	Yes	12	0.597712	0.0022172	0.751336	0.000423469	9.93704	0.127991
1	500	Yes	13	0.593186	0.00445909	0.733214	0.000457596	10.7137	0.126631
1	500	Yes	14	0.549366	0.00275101	0.715026	0.000538803	11.504	0.134925
1	500	Yes	15	0.544042	0.00555961	0.697281	0.000555058	12.2722	0.142294
1	500	Yes	16	0.538992	0.00382608	0.678057	0.00053741	13.0185	0.181317
1	500	Yes	17	0.517551	0.00293893	0.659326	0.000547743	13.7669	0.202459
1	500	Yes	18	0.502224	0.00471535	0.643219	0.000660425	14.4856	0.196721
1	500	Yes	19	0.469382	0.00341234	0.627923	0.00062574	15.1968	0.226391
1	500	Yes	20	0.447387	0.00385077	0.611398	0.000629974	15.8843	0.235897
1	500	Yes	21	0.445985	0.00465817	0.595	0.000697524	16.5555	0.276308
1	500	Yes	22	0.429551	0.00377418	0.578345	0.000617493	17.2071	0.330597
1	500	Yes	23	0.420474	0.00417852	0.561253	0.000645172	17.866	0.387503
1	500	Yes	24	0.397548	0.00235646	0.546967	0.000752556	18.5231	0.433791
1	500	Yes	25	0.386569	0.00285839	0.531737	0.000915732	19.1676	0.483157
1	500	Yes	26	0.372856	0.00267227	0.517535	0.000923099	19.794	0.542457
1	500	Yes	27	0.355498	0.00384582	0.503859	0.000855438	20.4204	0.567731
1	500	Yes	28	0.343514	0.00254943	0.488228	0.000869616	21.0129	0.59905
1	500	Yes	29	0.329342	0.00248593	0.473809	0.000883769	21.5981	0.635689
1	500	Yes	30	0.329871	0.00255488	0.460785	0.000925409	22.1901	0.703912
1	500	Yes	31	0.311755	0.0027378	0.448384	0.00096264	22.793	0.770483
1	500	Yes	32	0.297835	0.0035613	0.434796	0.000930141	23.3586	0.809149
1	500	Yes	33	0.271633	0.00251061	0.421024	0.000847852	23.9236	0.907569
1	500	Yes	34	0.271019	0.00250302	0.409441	0.000794138	24.4601	0.981338
1	500	Yes	35	0.252877	0.00222945	0.396207	0.00078475	25	1.08344
1	500	Yes	36	0.250367	0.0024137	0.384872	0.000768785	25.5104	1.16712
1	500	Yes	37	0.234578	0.00194689	0.374526	0.00069121	26.0128	1.24675
1	500	Yes	38	0.225254	0.00206825	0.364923	0.000670943	26.4968	1.31109
1	500	Yes	39	0.220857	0.00214582	0.355596	0.000656908	26.9802	1.39204
1	500	Yes	40	0.215655	0.00237712	0.346525	0.000704275	27.461	1.4835
1	500	Yes	41	0.207075	0.0017726	0.335271	0.000593864	27.9459	1.59956
1	500	Yes	42	0.203048	0.00206149	0.325318	0.00054886	28.3877	1.69196
1	500	Yes	43	0.19362	0.00137718	0.317018	0.000520354	28.8489	1.81397
1	500	Yes	44	0.185778	0.00151959	0.306457	0.000539472	29.2958	1.91359
1	500	Yes	45	0.176528	0.00132897	0.297252	0.000514971	29.7263	2.02767
1	500	Yes	46	0.168938	0.00138746	0.287478	0.000483447	30.1554	2.12344
1	500	Yes	47	0.158446	0.00120005	0.278481	0.000437922	30.5604	2.22536
1	500	Yes	48	0.151996	0.000858035	0.269512	0.000455209	30.9598	2.3549
1	500	Yes	49	0.143369	0.000709379	0.260725	0.000464359	31.344	2.4748
1	500	Yes	50	0.137449	0.000836444	0.252631	0.000463445	31.721	2.59789
1	500	Yes	51	0.130458	0.000664078	0.245274	0.000510435	32.0855	2.74572
1	500	Yes	52	0.121032	0.000453189	0.237337	0.000523987	32.4542	2.82852
1	500	Yes	53	0.117496	0.00067934	0.229213	0.000519308	32.8024	2.91942
1	500	Yes	54	0.111158	0.00078099	0.221046	0.000506932	33.1415	3.03556
1	500	Yes	55	0.109582	0.000863879	0.214191	0.00054475	33.4764	3.13951
1	500	Yes	56	0.106084	0.000569845	0.206871	0.000464179	33.8123	3.267
1	500	Yes	57	0.0981995	0.000555821	0.199596	0.00044366	34.129	3.35762
1	500	Yes	58	0.0957791	0.000524623	0.192603	0.000416271	34.437	3.46223
1	500	Yes	59	0.0909723	0.000439803	0.186246	0.000419775	34.7452	3.54427
1	500	Yes	60	0.0850759	0.000248674	0.179234	0.000409986	35.0461	3.64922
1	500	Yes	61	0.0804623	0.000287575	0.173738	0.000388272	35.3397	3.74523
1	500	Yes	62	0.0781503	0.000283673	0.168185	0.000381129	35.6213	3.84189
1	500	Yes	63	0.0739265	0.000193054	0.161523	0.00034373	35.9013	3.9285
1	500	Yes	64	0.0668041	0.000186251	0.155117	0.000327683	36.1777	4.02797
1	500	Yes	65	0.0648222	0.000192017	0.149001	0.000309547	36.4303	4.08351
1	500	Yes	66	0.059604	0.000132768	0.143174	0.00029023	36.6786	4.16318
1	500	Yes	67	0.0563189	0.000137247	0.137902	0.000272581	36.9246	4.24309
1	500	Yes	68	0.052829	0.00011896	0.132722	0.000249555	37.1586	4.28217
1	500	Yes	69	0.051001	0.000137608	0.127634	0.000217077	37.3903	4.33202
1	500	Yes	70	0.0466323	9.8019e-05	0.123294	0.000187083	37.6202	4.38877
1	500	Yes	71	0.0438038	0.000101175	0.118483	0.000145756	37.8432	4.47535
1	500	Yes	72	0.0413242	8.8991e-05	0.114033	0.000112432	38.0581	4.55884
1	500	Yes	73	0.0401013	7.11215e-05	0.110244	9.33971e-05	38.2537	4.64069
1	500	Yes	74	0.0377155	9.82428e-05	0.106041	0.000104855	38.4539	4.70674
1	500	Yes	75	0.0349517	8.21701e-05	0.101629	9.4216e-05	38.6545	4.79844
1	500	Yes	76	0.0330871	8.02154e-05	0.0974361	9.23631e-05	38.8408	4.85057
1	500	Yes	77	0.0305175	4.64546e-05	0.0939774	9.0381e-05	39.0235	4.9336
1	500	Yes	78	0.0281688	4.20867e-05	0.0898216	0.000101398	39.1971	4.99925
1	500	Yes	79	0.0266219	4.00115e-05	0.0860336	0.000105678	39.3637	5.07702
1	500	Yes	80	0.0249288	3.57155e-05	0.0824321	9.66074e-05	39.5252	5.138
1	500	Yes	81	0.0236352	3.26306e-05	0.079096	0.000101098	39.6828	5.21561
1	1000	No	1	1	0	1	0	0	0
1	1000	No	2	0.997569	0.00594804	0.980462	2.60134e-05	1.01629	0.00241999
1	1000	No	3	0.930238	0.00434944	0.960879	4.60488e-05	2.00992	0.00546105
1	1000	No	4	0.897484	0.00522966	0.939764	6.36253e-05	2.98808	0.00887494
1	1000	No	5	0.862907	0.00591258	0.919377	8.202e-05	3.94409	0.0164706
1	1000	No	6	0.7928	0.00613816	0.898532	9.98366e-05	4.90788	0.0263128
1	1000	No	7	0.77519	0.0020591	0.875767	0.000106554	5.80868	0.0440862
1	1000	No	8	0.761223	0.00358486	0.855018	0.000133807	6.71283	0.0445597
1	1000	No	9	0.719435	0.00298684	0.835845	0.000150519	7.58971	0.0580063
1	1000	No	10	0.677737	0.00397365	0.818554	0.000175236	8.4454	0.0861837
1	1000	No	11	0.664981	0.00415991	0.798953	0.000184415	9.28299	0.114193
1	1000	No	12	0.635743	0.00556634	0.780242	0.000238495	10.1197	0.1379
1	1000	No	13	0.627915	0.00360364	0.760815	0.000231115	10.9511	0.166972
1	1000	No	14	0.594358	0.00206049	0.741311	0.000215295	11.7678	0.177521
1	1000	No	15	0.572886	0.00209107	0.722635	0.000229472	12.5264	0.171536
1	1000	No	16	0.544497	0.00182973	0.705556	0.000258123	13.3026	0.187515
1	1000	No	17	0.535673	0.00188623	0.688725	0.000279918	14.0336	0.194408
1	1000	No	18	0.514986	0.00192188	0.672691	0.000391717	14.7561	0.208088
1	1000	No	19	0.497579	0.00271808	0.655972	0.000509242	15.484	0.227088
1	1000	No	20	0.4831	0.00235478	0.637693	0.000543139	16.1805	0.243121
1	1000	No	21	0.460057	0.00250007	0.619243	0.000535469	16.8766	0.248057
1	1000	No	22	0.443136	0.00193309	0.60309	0.000590966	17.5698	0.291662
1	1000	No	23	0.405779	0.00198161	0.586687	0.000692844	18.2283	0.337135
1	1000	No	24	0.399812	0.00248313	0.572329	0.000666595	18.8694	0.374361
1	1000	No	25	0.390298	0.00271858	0.557594	0.000701642	19.5139	0.405999
1	1000	No	26	0.379228	0.0025939	0.544196	0.000691931	20.1302	0.455269
1	1000	No	27	0.360233	0.00273036	0.528846	0.00066037	20.7628	0.510365
1	1000	No	28	0.338932	0.00206414	0.512069	0.000771205	21.3609	0.553489
1	1000	No	29	0.325309	0.00249986	0.496824	0.000750982	21.9476	0.575984
1	1000	No	30	0.312346	0.00208048	0.484585	0.000698976	22.527	0.655927
1	1000	No	31	0.300371	0.0015017	0.470938	0.000706445	23.0967	0.703963
1	1000	No	32	0.272525	0.00138166	0.458624	0.000585679	23.6477	0.750296
1	1000	No	33	0.265536	0.000940797	0.443994	0.000623775	24.1743	0.806439
1	1000	No	34	0.259228	0.000600763	0.431315	0.000625004	24.6846	0.829091
1	1000	No	35	0.250259	0.000617515	0.419007	0.000567646	25.2066	0.830807
1	1000	No	36	0.240086	0.000674193	0.406358	0.000548415	25.7252	0.848398
1	1000	No	37	0.235262	0.000390741	0.393873	0.000532645	26.2226	0.852882
1	1000	No	38	0.227159	0.000292255	0.382563	0.000529829	26.7019	0.878132
1	1000	No	39	0.207967	0.000820757	0.369642	0.000538478	27.1784	0.90483
1	1000	No	40	0.200852	0.000795942	0.358211	0.000503461	27.6366	0.927802
1	1000	No	41	0.193201	0.000902828	0.349053	0.000561717	28.1015	0.957412
1	1000	No	42	0.185075	0.000533429	0.338459	0.000568361	28.5473	0.975785
1	1000	No	43	0.178659	0.000462914	0.327707	0.000538414	28.9852	1.01003
1	1000	No	44	0.169802	0.000553941	0.31761	0.00056562	29.4002	1.05951
1	1000	No	45	0.147849	0.000288454	0.307915	0.000588251	29.8261	1.09517
1	1000	No	46	0.15489	0.00054228	0.298764	0.000587026	30.2179	1.11923
1	1000	No	47	0.148965	0.00047025	0.290271	0.000552328	30.6017	1.13772
1	1000	No	48	0.140841	0.000500713	0.281753	0.000545772	30.9778	1.166
1	1000	No	49	0.139048	0.00075684	0.273023	0.00051727	31.357	1.21838
1	1000	No	50	0.128516	0.000467417	0.263935	0.000515989	31.7291	1.25661
1	1000	No	51	0.123374	0.000478181	0.255234	0.000513377	32.0806	1.31301
1	1000	No	52	0.117328	0.000418203	0.246052	0.000508272	32.4449	1.33129
1	1000	No	53	0.109375	0.000363295	0.239296	0.000510115	32.7923	1.36755
1	1000	No	54	0.101007	0.000349491	0.232023	0.000508317	33.1276	1.41191
1	1000	No	55	0.0964045	0.000233449	0.225242	0.00046856	33.4504	1.4537
1	1000	No	56	0.0929325	0.000221427	0.218441	0.000497986	33.7632	1.50272
1	1000	No	57	0.0886593	0.000167318	0.210638	0.000526379	34.0697	1.53111
1	1000	No	58	0.0868589	0.000242956	0.204865	0.000544722	34.3687	1.57868
1	1000	No	59	0.0827495	0.000232063	0.197595	0.000527889	34.6657	1.63
1	1000	No	60	0.0805791	0.000239534	0.191892	0.000539161	34.9595	1.66839
1	1000	No	61	0.0776398	0.000231407	0.18584	0.000517943	35.257	1.73063
1	1000	No	62	0.0731615	0.000173613	0.179109	0.000488587	35.5367	1.79131
1	1000	No	63	0.0680035	0.000160655	0.172369	0.000442226	35.813	1.85974
1	1000	No	64	0.0644119	9.71127e-05	0.166658	0.000425178	36.0834	1.91129
1	1000	No	65	0.0621432	9.97749e-05	0.161363	0.000388863	36.3392	1.96288
1	1000	No	66	0.0600547	6.05498e-05	0.155775	0.000370788	36.5904	2.01901
1	1000	No	67	0.0567921	5.55961e-05	0.149747	0.000359129	36.8382	2.04569
1	1000	No	68	0.0537205	4.77512e-05	0.144309	0.000357273	37.078	2.07572
1	1000	No	69	0.051868	4.64085e-05	0.139586	0.000334785	37.312	2.07696
1	1000	No	70	0.048877	3.4341e-05	0.134739	0.000307806	37.5394	2.0948
1	1000	No	71	0.046851	2.39002e-05	0.130073	0.000297216	37.7665	2.09566
1	1000	No	72	0.0443156	3.07775e-05	0.124766	0.000322241	37.9873	2.10759
1	1000	No	73	0.0429537	3.66172e-05	0.120085	0.00031908	38.1947	2.11973
1	1000	No	74	0.04165	3.87083e-05	0.115179	0.000303013	38.4021	2.16412
1	1000	No	75	0.0396233	4.48525e-05	0.11153	0.000301881	38.6149	2.21154
1	1000	No	76	0.0369881	3.2266e-05	0.107505	0.000291468	38.8051	2.24551
1	1000	No	77	0.0347844	2.80189e-05	0.103812	0.000267735	39.0029	2.2743
1	1000	No	78	0.0324145	3.60693e-05	0.0997106	0.000262997	39.1901	2.30713
1	1000	No	79	0.0312123	4.36885e-05	0.0959678	0.000259453	39.3679	2.33603
1	1000	No	80	0.0288366	3.78373e-05	0.0921032	0.000246961	39.5447	2.37431
1	1000	No	81	0.0262016	2.6739e-05	0.0884382	0.000228287	39.7172	2.40701
1	1000	Yes	1	1	0	1	0	0	0
1	1000	Yes	2	0.97631	0.0056977	0.980318	1.61593e-05	1.01969	0.00223948
1	1000	Yes	3	0.928183	0.00739314	0.959044	2.86094e-05	2.02784	0.0028773
1	1000	Yes	4	0.873151	0.00592104	0.936949	0.000102594	3.02508	0.00960633
1	1000	Yes	5	0.825105	0.00409819	0.917097	0.000138669	3.98372	0.0140072
1	1000	Yes	6	0.803849	0.00439229	0.897614	0.000147345	4.90973	0.0217459
1	1000	Yes	7	0.779514	0.00197146	0.877084	0.000180284	5.82636	0.0280288
1	1000	Yes	8	0.760207	0.00256269	0.855487	0.00030275	6.72624	0.0507177
1	1000	Yes	9	0.704719	0.00563662	0.834621	0.000363285	7.62077	0.0547207
1	1000	Yes	10	0.694172	0.00494445	0.817665	0.000456571	8.46414	0.0801912
1	1000	Yes	11	0.651017	0.00682734	0.797824	0.000528613	9.33376	0.114282
1	1000	Yes	12	0.660223	0.00512802	0.779612	0.000454489	10.1485	0.152601
1	1000	Yes	13	0.627778	0.00543713	0.760224	0.000520916	11.0054	0.179583
1	1000	Yes	14	0.604086	0.00307344	0.743591	0.000613474	11.8243	0.203031
1	1000	Yes	15	0.573204	0.00379984	0.724917	0.000612719	12.6265	0.220683
1	1000	Yes	16	0.577865	0.00296105	0.707175	0.000696927	13.4056	0.265258
1	1000	Yes	17	0.549853	0.00532326	0.687592	0.000780151	14.1877	0.28464
1	1000	Yes	18	0.523585	0.00305345	0.670165	0.00087213	14.9407	0.308299
1	1000	Yes	19	0.510056	0.0018715	0.652284	0.000725297	15.7043	0.325437
1	1000	Yes	20	0.495039	0.000995028	0.636757	0.000798453	16.4079	0.339295
1	1000	Yes	21	0.479091	0.00112678	0.621221	0.000831662	17.134	0.357076
1	1000	Yes	22	0.461595	0.00349966	0.606532	0.000789238	17.8585	0.364594
1	1000	Yes	23	0.437462	0.00155541	0.589792	0.000699429	18.5433	0.406716
1	1000	Yes	24	0.419854	0.00155689	0.573771	0.000677326	19.2199	0.424183
1	1000	Yes	25	0.405079	0.00223276	0.560326	0.000636907	19.8615	0.453962
1	1000	Yes	26	0.396532	0.00259646	0.546178	0.000644419	20.5057	0.473057
1	1000	Yes	27	0.374435	0.00176265	0.531262	0.000694052	21.1581	0.518666
1	1000	Yes	28	0.371063	0.00232546	0.518452	0.000593752	21.7692	0.543541
1	1000	Yes	29	0.357921	0.0017814	0.50515	0.000550307	22.3878	0.568975
1	1000	Yes	30	0.341698	0.00200983	0.49239	0.000562902	23.0013	0.624275
1	1000	Yes	31	0.329172	0.00119055	0.479396	0.000595528	23.6054	0.67918
1	1000	Yes	32	0.320515	0.0010234	0.46728	0.000518734	24.1851	0.755138
1	1000	Yes	33	0.308266	0.00113385	0.456179	0.000562416	24.76	0.795201
1	1000	Yes	34	0.297631	0.00106297	0.444829	0.000569832	25.3183	0.844002
1	1000	Yes	35	0.296841	0.000713348	0.434194	0.000572098	25.8642	0.864713
1	1000	Yes	36	0.287165	0.000765636	0.42266	0.000561077	26.4155	0.894691
1	1000	Yes	37	0.276211	0.00105373	0.412293	0.000568994	26.9565	0.945831
1	1000	Yes	38	0.271576	0.0016627	0.401091	0.000506399	27.4905	1.0336
1	1000	Yes	39	0.266703	0.00107351	0.390533	0.000451367	28.0132	1.13816
1	1000	Yes	40	0.250173	0.000772841	0.379991	0.000469714	28.5331	1.18859
1	1000	Yes	41	0.24553	0.000737641	0.369588	0.000461154	29.0511	1.17807
1	1000	Yes	42	0.238363	0.000548432	0.358551	0.00044893	29.5601	1.26563
1	1000	Yes	43	0.22748	0.000471116	0.34819	0.000379237	30.0586	1.30513
1	1000	Yes	44	0.217616	0.000611578	0.338441	0.000324042	30.5407	1.34288
1	1000	Yes	45	0.211611	0.00073181	0.32904	0.000282075	31.0113	1.38333
1	1000	Yes	46	0.205804	0.000469098	0.31972	0.000241431	31.4772	1.42486
1	1000	Yes	47	0.198657	0.000515416	0.311433	0.000198967	31.9367	1.4757
1	1000	Yes	48	0.186976	0.000342581	0.301981	0.000174	32.3892	1.52478
1	1000	Yes	49	0.179683	0.000394863	0.292365	0.000176369	32.837	1.56267
1	1000	Yes	50	0.174996	0.000239126	0.284263	0.000166413	33.2511	1.61065
1	1000	Yes	51	0.166689	0.000438323	0.274651	0.000150065	33.6761	1.66284
1	1000	Yes	52	0.160423	0.000544027	0.266964	0.00013932	34.0806	1.68558
1	1000	Yes	53	0.150231	0.000402915	0.258422	0.000147042	34.4805	1.69971
1	1000	Yes	54	0.14353	0.000455382	0.250851	0.000160506	34.8763	1.70312
1	1000	Yes	55	0.14193	0.00049009	0.243314	0.000166582	35.2607	1.72521
1	1000	Yes	56	0.136246	0.000398815	0.235652	0.000165797	35.648	1.76556
1	1000	Yes	57	0.130918	0.00049925	0.227984	0.000180388	36.0185	1.7819
1	1000	Yes	58	0.124008	0.000547749	0.220047	0.0001749	36.3923	1.81533
1	1000	Yes	59	0.117348	0.000338121	0.212958	0.000175334	36.7528	1.82712
1	1000	Yes	60	0.113764	0.000531058	0.206017	0.000181771	37.108	1.8527
1	1000	Yes	61	0.10908	0.00053243	0.199817	0.000194719	37.442	1.91251
1	1000	Yes	62	0.103433	0.000492388	0.19383	0.000217897	37.7694	1.97384
1	1000	Yes	63	0.0998471	0.000464852	0.187623	0.000226016	38.0948	1.99032
1	1000	Yes	64	0.0941494	0.000258455	0.181015	0.000241729	38.4207	2.02198
1	1000	Yes	65	0.0905292	0.00032608	0.174902	0.000255304	38.725	2.0432
1	1000	Yes	66	0.0888868	0.000276994	0.16876	0.000246654	39.0363	2.09455
1	1000	Yes	67	0.0840241	0.000255362	0.163021	0.00025053	39.3451	2.17417
1	1000	Yes	68	0.0813677	0.000228451	0.156766	0.000233001	39.6344	2.2454
1	1000	Yes	69	0.0769374	0.000266978	0.150824	0.000237623	39.9195	2.32097
1	1000	Yes	70	0.0716113	0.000198455	0.145825	0.000227302	40.1966	2.39763
1	1000	Yes	71	0.069793	0.000229433	0.141187	0.000221815	40.4635	2.43895
1	1000	Yes	72	0.065253	0.000171466	0.135845	0.000235981	40.7399	2.51705
1	1000	Yes	73	0.061827	0.000136783	0.131092	0.000220379	40.9927	2.58374
1	1000	Yes	74	0.0582411	0.000157404	0.126495	0.000206543	41.246	2.64994
1	1000	Yes	75	0.0556491	8.18645e-05	0.122104	0.000215681	41.4897	2.71669
1	1000	Yes	76	0.0540543	0.000128359	0.11789	0.000219391	41.7282	2.75751
1	1000	Yes	77	0.0517572	0.000103221	0.113363	0.000212468	41.9641	2.78439
1	1000	Yes	78	0.0490753	9.99389e-05	0.109266	0.000203126	42.1877	2.84474
1	1000	Yes	79	0.0448904	7.3449e-05	0.105085	0.000200079	42.4085	2.90178
1	1000	Yes	80	0.0432886	8.92958e-05	0.101364	0.000201048	42.6205	2.95409
1	1000	Yes	81	0.0419647	8.05124e-05	0.0981241	0.000200978	42.8269	3.00269
2	250	No	1	1	0	1	0	0	0
2	250	No	2	0.956706	0.00582175	0.968481	8.05515e-05	1.0208	0.00271269
2	250	No	3	0.877862	0.0053534	0.936864	0.000163518	2.00228	0.0104887
2	250	No	4	0.813155	0.00865089	0.905236	0.000221012	2.95961	0.0215102
2	250	No	5	0.76652	0.00882349	0.874682	0.000342528	3.87584	0.0294495
2	250	No	6	0.704183	0.00673448	0.843581	0.000352593	4.74225	0.0484821
2	250	No	7	0.661532	0.00500362	0.812901	0.000436474	5.58505	0.0654026
2	250	No	8	0.609013	0.00437652	0.783112	0.000509339	6.41591	0.0959299
2	250	No	9	0.576708	0.00468406	0.753782	0.000609306	7.2006	0.12159
2	250	No	10	0.53393	0.00456718	0.727173	0.000636717	7.93448	0.159422
2	250	No	11	0.488437	0.00501341	0.701777	0.000658604	8.6586	0.200022
2	250	No	12	0.47453	0.0062804	0.674037	0.000846801	9.35006	0.234554
2	250	No	13	0.434721	0.00515405	0.647111	0.00102469	10.0552	0.28239
2	250	No	14	0.3908	0.00316586	0.621487	0.00108857	10.7216	0.319018
2	250	No	15	0.354661	0.00244717	0.59567	0.000961833	11.3407	0.355277
2	250	No	16	0.329292	0.00196255	0.574303	0.00102565	11.9333	0.396146
2	250	No	17	0.30733	0.00292018	0.548451	0.00118743	12.5131	0.4173
2	250	No	18	0.274539	0.00202694	0.52684	0.00129843	13.0501	0.462394
2	250	No	19	0.254358	0.00127669	0.506237	0.00112155	13.5803	0.528664
2	250	No	20	0.2395	0.00138232	0.485306	0.00125741	14.0917	0.571943
2	250	No	21	0.214278	0.00100677	0.4636	0.00134551	14.5797	0.62667
2	250	No	22	0.195076	0.00110342	0.442141	0.0014709	15.0399	0.681914
2	250	No	23	0.184204	0.00123225	0.423323	0.00133647	15.4695	0.737865
2	250	No	24	0.171013	0.000833473	0.406248	0.0014722	15.8907	0.80568
2	250	No	25	0.158181	0.000758942	0.387519	0.0013773	16.3132	0.89443
2	250	No	26	0.145646	0.000630861	0.369178	0.00140405	16.7009	0.967293
2	250	No	27	0.131682	0.000473464	0.352725	0.00130201	17.0867	1.0431
2	250	No	28	0.119928	0.000212282	0.336822	0.00121594	17.4387	1.09593
2	250	No	29	0.109221	0.000263449	0.321139	0.00124316	17.7822	1.14511
2	250	No	30	0.0978655	0.000286975	0.306668	0.00123594	18.1124	1.17772
2	250	No	31	0.0909139	0.0002848	0.293872	0.00118	18.4254	1.23011
2	250	No	32	0.0839007	0.000214674	0.280204	0.0010979	18.7228	1.27514
2	250	No	33	0.0757084	0.00018603	0.26683	0.00100948	19.0126	1.3037
2	250	No	34	0.0668488	0.000121904	0.255542	0.000987727	19.2718	1.32279
2	250	No	35	0.0609884	8.50506e-05	0.242713	0.000979774	19.5324	1.3428
2	250	No	36	0.0552399	8.86e-05	0.229237	0.000918248	19.783	1.35847
2	250	No	37	0.0497698	6.09084e-05	0.218469	0.000897784	20.0177	1.37878
2	250	No	38	0.0451977	6.59031e-05	0.206799	0.000775389	20.2362	1.39626
2	250	No	39	0.0394843	5.30802e-05	0.195199	0.000774774	20.4452	1.41902
2	250	No	40	0.0352371	3.27918e-05	0.185001	0.000784369	20.6382	1.44295
2	250	No	41	0.0308059	2.97921e-05	0.17539	0.000820832	20.8297	1.46769
2	250	No	42	0.0277866	1.94941e-05	0.166936	0.000790791	21.001	1.49423
2	250	No	43	0.024486	1.35649e-05	0.157723	0.000730857	21.1704	1.52781
2	250	No	44	0.0212758	1.29383e-05	0.149802	0.000667819	21.3239	1.55138
2	250	No	45	0.0189342	8.23824e-06	0.140791	0.00060898	21.471	1.56719
2	250	No	46	0.0166647	7.11741e-06	0.132392	0.000515944	21.6084	1.57494
2	250	No	47	0.0145884	9.07742e-06	0.124995	0.000490115	21.7321	1.59329
2	250	No	48	0.0128419	5.73676e-06	0.116869	0.000450785	21.8517	1.60889
2	250	No	49	0.011061	5.26208e-06	0.108942	0.000375833	21.9627	1.62954
2	250	No	50	0.00983354	6.04349e-06	0.100817	0.00029821	22.0655	1.65018
2	250	No	51	0.00887243	6.18944e-06	0.0936814	0.000257924	22.1594	1.67225
2	250	No	52	0.00754762	5.019e-06	0.086398	0.000241712	22.2508	1.70086
2	250	No	53	0.00659825	3.96423e-06	0.0800429	0.000253671	22.3366	1.72067
2	250	No	54	0.00575247	3.22163e-06	0.0737572	0.000238596	22.413	1.74136
2	250	No	55	0.00496275	2.94707e-06	0.0671769	0.000206615	22.4847	1.76288
2	250	No	56	0.00396527	2.1106e-06	0.0615995	0.000195804	22.5519	1.77908
2	250	No	57	0.00334602	1.70182e-06	0.0567419	0.000186793	22.6121	1.79056
2	250	No	58	0.00269704	1.76235e-06	0.0519104	0.000185754	22.6673	1.8028
2	250	No	59	0.00218447	1.68655e-06	0.0479189	0.000198929	22.7152	1.81153
2	250	No	60	0.00168964	1.12435e-06	0.0437324	0.000182583	22.7574	1.81959
2	250	No	61	0.00133312	8.50081e-07	0.0400615	0.000180464	22.794	1.826
2	250	No	62	0.00101095	4.6947e-07	0.036178	0.000172208	22.8249	1.8311
2	250	No	63	0.000741222	2.62298e-07	0.0319405	0.000168516	22.8533	1.83535
2	250	No	64	0.0005269	1.59192e-07	0.0281528	0.000164043	22.8775	1.83879
2	250	No	65	0.000373875	8.78246e-08	0.0243149	0.000164833	22.8972	1.84303
2	250	No	66	0.000266279	4.8272e-08	0.0204197	0.000155256	22.9138	1.84669
2	250	No	67	0.00017663	2.15684e-08	0.0167783	0.000126287	22.9273	1.85006
2	250	No	68	0.000116867	9.30352e-09	0.0132624	9.69551e-05	22.9377	1.85267
2	250	No	69	7.84452e-05	4.31008e-09	0.00999201	6.0443e-05	22.9461	1.85389
2	250	No	70	5.4711e-05	2.12914e-09	0.0076588	4.04392e-05	22.9524	1.8557
2	250	No	71	3.85314e-05	1.53399e-09	0.00588361	2.72516e-05	22.9574	1.85847
2	250	No	72	3.01852e-05	1.63129e-09	0.00489738	2.34203e-05	22.9611	1.86148
2	250	No	73	2.42784e-05	1.49865e-09	0.0035469	1.41215e-05	22.9641	1.86464
2	250	No	74	1.98893e-05	1.52522e-09	0.00229036	5.51692e-06	22.9666	1.86754
2	250	No	75	1.17282e-05	7.38419e-10	0.00138371	2.06054e-06	22.9685	1.87085
2	250	No	76	8.91349e-06	4.87093e-10	0.00101934	2.34614e-06	22.9699	1.8735
2	250	No	77	5.07349e-06	1.67286e-10	0.000907175	3.46995e-06	22.9708	1.87557
2	250	No	78	2.4741e-06	4.18895e-11	0.00116349	5.00242e-06	22.9713	1.87678
2	250	No	79	1.79927e-06	2.13312e-11	0.00136771	9.28778e-06	22.9716	1.87724
2	250	No	80	8.97783e-07	5.63876e-12	0.00120166	8.97536e-06	22.9719	1.87743
2	250	No	81	7.10925e-07	3.45243e-12	0.000722705	3.20721e-06	22.972	1.87745
2	250	Yes	1	1	0	1	0	0	0
2	250	Yes	2	0.976941	0.00866656	0.967503	9.40446e-05	1.02107	0.00333135
2	250	Yes	3	0.91405	0.0108459	0.936448	0.000160575	2.00532	0.00559766
2	250	Yes	4	0.853833	0.0103066	0.903154	0.000214257	2.99301	0.0152109
2	250	Yes	5	0.803544	0.0118295	0.874304	0.000250433	3.91139	0.0262455
2	250	Yes	6	0.756633	0.0127343	0.847753	0.000319369	4.81367	0.0487988
2	250	Yes	7	0.716334	0.0134561	0.823437	0.000352614	5.70179	0.0831931
2	250	Yes	8	0.677902	0.0147319	0.796724	0.000325386	6.54827	0.120842
2	250	Yes	9	0.644154	0.0128529	0.771957	0.000474171	7.3738	0.164091
2	250	Yes	10	0.62975	0.00946648	0.748563	0.000643347	8.15988	0.21505
2	250	Yes	11	0.59189	0.0112104	0.724935	0.000873251	8.96268	0.272308
2	250	Yes	12	0.571513	0.00831448	0.701544	0.000895004	9.72275	0.334244
2	250	Yes	13	0.543192	0.00931672	0.679321	0.00111601	10.507	0.408699
2	250	Yes	14	0.521747	0.00955467	0.662229	0.00126293	11.2365	0.489131
2	250	Yes	15	0.510613	0.00875775	0.644729	0.00124886	11.941	0.537572
2	250	Yes	16	0.492428	0.00786092	0.629181	0.00137185	12.6566	0.609338
2	250	Yes	17	0.474154	0.00936935	0.61115	0.00137601	13.37	0.695781
2	250	Yes	18	0.464361	0.0102823	0.595713	0.00130882	14.0793	0.772049
2	250	Yes	19	0.444104	0.00968718	0.582414	0.00124616	14.7676	0.878886
2	250	Yes	20	0.448112	0.0105361	0.567711	0.00121422	15.4322	0.988768
2	250	Yes	21	0.449214	0.00824248	0.555289	0.00122613	16.1102	1.12895
2	250	Yes	22	0.452933	0.0124993	0.544725	0.00131389	16.7832	1.22492
2	250	Yes	23	0.438062	0.00738291	0.533356	0.00129498	17.4695	1.39645
2	250	Yes	24	0.427629	0.00753356	0.521427	0.00122948	18.1495	1.59104
2	250	Yes	25	0.417019	0.00563722	0.508276	0.00121418	18.8381	1.79079
2	250	Yes	26	0.414463	0.00658632	0.495886	0.00116896	19.4923	1.94852
2	250	Yes	27	0.405915	0.00691682	0.484649	0.0011614	20.1507	2.09466
2	250	Yes	28	0.406639	0.0101235	0.472984	0.00104884	20.7868	2.26663
2	250	Yes	29	0.382606	0.00898679	0.460928	0.00101155	21.4512	2.45905
2	250	Yes	30	0.364258	0.00637802	0.450441	0.000933808	22.0629	2.70666
2	250	Yes	31	0.362	0.00708583	0.438568	0.000844693	22.6814	2.96962
2	250	Yes	32	0.361871	0.00712361	0.426449	0.000826555	23.2827	3.16294
2	250	Yes	33	0.353064	0.00499512	0.415364	0.000850188	23.8963	3.35315
2	250	Yes	34	0.35123	0.00459698	0.403215	0.000789459	24.5036	3.53288
2	250	Yes	35	0.351328	0.00447353	0.392598	0.000748962	25.1005	3.82595
2	250	Yes	36	0.33947	0.00437403	0.380772	0.000755105	25.7111	4.07556
2	250	Yes	37	0.322463	0.00409121	0.369345	0.000728847	26.3073	4.22706
2	250	Yes	38	0.319158	0.00426925	0.357863	0.000742533	26.8763	4.36393
2	250	Yes	39	0.304056	0.00570846	0.347655	0.000796701	27.4535	4.57114
2	250	Yes	40	0.292791	0.00376014	0.339457	0.000758489	28.0091	4.82258
2	250	Yes	41	0.288444	0.00405788	0.330653	0.000742591	28.5672	5.05229
2	250	Yes	42	0.285308	0.00457295	0.321205	0.00078233	29.108	5.32752
2	250	Yes	43	0.268266	0.00412899	0.311569	0.000765077	29.6567	5.52219
2	250	Yes	44	0.256357	0.00377434	0.302747	0.000716255	30.181	5.85172
2	250	Yes	45	0.245489	0.00294481	0.293595	0.000702156	30.6828	6.18773
2	250	Yes	46	0.237468	0.0039075	0.285354	0.00069086	31.1983	6.40604
2	250	Yes	47	0.230589	0.00285835	0.276823	0.00069059	31.6757	6.63168
2	250	Yes	48	0.230567	0.00352699	0.267701	0.000728664	32.1634	6.95273
2	250	Yes	49	0.216674	0.00332367	0.258534	0.000689586	32.6548	7.2328
2	250	Yes	50	0.209903	0.00381958	0.249253	0.000642238	33.1209	7.55212
2	250	Yes	51	0.198625	0.00375512	0.240162	0.000608315	33.5801	7.89598
2	250	Yes	52	0.189363	0.00295855	0.230782	0.000529703	34.0329	8.20412
2	250	Yes	53	0.182253	0.00403262	0.223862	0.000545709	34.4713	8.50979
2	250	Yes	54	0.170903	0.00265319	0.216188	0.000574208	34.8867	8.87013
2	250	Yes	55	0.163355	0.00191568	0.208206	0.000533182	35.3048	9.18087
2	250	Yes	56	0.157226	0.00217187	0.201638	0.000493777	35.7101	9.43293
2	250	Yes	57	0.15124	0.00191911	0.195231	0.000441186	36.1045	9.74432
2	250	Yes	58	0.14379	0.00121352	0.188756	0.000403146	36.4886	10.0545
2	250	Yes	59	0.137411	0.00105084	0.181734	0.000389816	36.8704	10.3618
2	250	Yes	60	0.133726	0.00110939	0.175838	0.000334113	37.2465	10.626
2	250	Yes	61	0.129067	0.00104035	0.170076	0.000320967	37.6173	10.906
2	250	Yes	62	0.121093	0.000735266	0.164305	0.000278745	37.9777	11.1503
2	250	Yes	63	0.118538	0.000850027	0.159631	0.000250138	38.3241	11.3994
2	250	Yes	64	0.110301	0.000589873	0.154096	0.000198055	38.6753	11.6976
2	250	Yes	65	0.107313	0.000730996	0.148239	0.000182801	39.0011	11.9649
2	250	Yes	66	0.103808	0.000622886	0.143075	0.000184405	39.3268	12.3404
2	250	Yes	67	0.10003	0.000609442	0.137361	0.000182193	39.6519	12.4946
2	250	Yes	68	0.0978446	0.000585999	0.132005	0.000203789	39.9754	12.7752
2	250	Yes	69	0.0944406	0.00058726	0.127677	0.000218219	40.2897	12.9033
2	250	Yes	70	0.0924136	0.00055572	0.12292	0.000217989	40.5922	13.1575
2	250	Yes	71	0.0885105	0.000396961	0.118601	0.000207472	40.9022	13.3857
2	250	Yes	72	0.0843833	0.000387529	0.114431	0.000199259	41.2065	13.5784
2	250	Yes	73	0.0830814	0.000442785	0.110718	0.000184496	41.4886	13.7656
2	250	Yes	74	0.0828468	0.000559918	0.106581	0.000153971	41.7761	13.9833
2	250	Yes	75	0.0780906	0.000478308	0.103075	0.000142541	42.0676	14.1937
2	250	Yes	76	0.0742608	0.000427415	0.0988008	0.00013939	42.3477	14.45
2	250	Yes	77	0.0689814	0.000385538	0.0945739	0.000128475	42.6267	14.7198
2	250	Yes	78	0.0661016	0.000348618	0.0907002	0.000124094	42.893	14.9963
2	250	Yes	79	0.0632743	0.000287197	0.0875209	0.000122297	43.1537	15.2991
2	250	Yes	80	0.0605153	0.000275494	0.0838076	0.000106415	43.4025	15.5051
2	250	Yes	81	0.0570396	0.00025706	0.0807308	9.9997e-05	43.6554	15.7332
2	500	No	1	1	0	1	0	0	0
2	500	No	2	0.95809	0.00110851	0.975221	1.8407e-05	1.0019	0.00244711
2	500	No	3	0.900301	0.00398684	0.950293	4.2987e-05	1.97818	0.00348196
2	500	No	4	0.848791	0.00200118	0.926103	9.7476e-05	2.94254	0.00502063
2	500	No	5	0.80849	0.00222579	0.90244	0.000167812	3.87068	0.0083086
2	500	No	6	0.765211	0.00521781	0.878148	0.000226632	4.79138	0.0097561
2	500	No	7	0.734861	0.0026925	0.854522	0.00026147	5.67457	0.011351
2	500	No	8	0.675043	0.00211328	0.831743	0.000267044	6.55013	0.0212579
2	500	No	9	0.647873	0.0023348	0.807525	0.000246624	7.38862	0.0305218
2	500	No	10	0.619228	0.00291293	0.784102	0.000259115	8.19452	0.0414076
2	500	No	11	0.604384	0.00348448	0.760605	0.000291306	8.98609	0.0601559
2	500	No	12	0.552271	0.00477056	0.735236	0.000370062	9.77841	0.079596
2	500	No	13	0.528148	0.00324529	0.712058	0.000517452	10.5471	0.108807
2	500	No	14	0.492452	0.00270245	0.68825	0.000591202	11.2712	0.120363
2	500	No	15	0.475868	0.00221214	0.666624	0.0005871	11.973	0.15514
2	500	No	16	0.450327	0.0024841	0.64661	0.000624436	12.6753	0.165316
2	500	No	17	0.422797	0.00280813	0.624811	0.000696335	13.3756	0.202659
2	500	No	18	0.395769	0.00255998	0.604035	0.000694883	14.0168	0.233757
2	500	No	19	0.370286	0.00150506	0.585245	0.000731073	14.6703	0.270521
2	500	No	20	0.351762	0.00267113	0.566895	0.000760813	15.3037	0.286492
2	500	No	21	0.338224	0.00291336	0.546785	0.000848985	15.9006	0.324709
2	500	No	22	0.315087	0.00156463	0.530043	0.000801172	16.4738	0.358948
2	500	No	23	0.29052	0.0027433	0.513786	0.000881114	17.0412	0.389588
2	500	No	24	0.271353	0.0018237	0.496758	0.000885174	17.591	0.431096
2	500	No	25	0.261298	0.00146005	0.47937	0.00093062	18.1186	0.47045
2	500	No	26	0.250754	0.00158646	0.464078	0.000959223	18.634	0.52091
2	500	No	27	0.229461	0.00132862	0.447965	0.000902803	19.1439	0.567444
2	500	No	28	0.217967	0.00197359	0.433011	0.000931364	19.612	0.625795
2	500	No	29	0.201089	0.00151951	0.41649	0.000801539	20.0926	0.702963
2	500	No	30	0.18631	0.00113444	0.401564	0.000756145	20.5304	0.743624
2	500	No	31	0.175073	0.00128492	0.386431	0.000698263	20.9648	0.809235
2	500	No	32	0.16204	0.00114463	0.372223	0.000642569	21.3894	0.850532
2	500	No	33	0.147931	0.000634224	0.356362	0.000560233	21.8007	0.921781
2	500	No	34	0.145841	0.000554921	0.345618	0.000477732	22.1797	0.959808
2	500	No	35	0.13215	0.00032299	0.332535	0.000435353	22.5641	1.00802
2	500	No	36	0.122494	0.000416963	0.318565	0.00040717	22.9381	1.02953
2	500	No	37	0.113826	0.000266619	0.305884	0.000417313	23.2841	1.06024
2	500	No	38	0.109264	0.000208817	0.294913	0.000420222	23.6282	1.09962
2	500	No	39	0.100276	0.000248476	0.283766	0.000407772	23.967	1.12898
2	500	No	40	0.0936982	0.00026379	0.27426	0.000404619	24.292	1.16556
2	500	No	41	0.0867427	0.000183008	0.264271	0.000378223	24.6134	1.17839
2	500	No	42	0.0823727	0.000231754	0.254444	0.000384719	24.9064	1.21381
2	500	No	43	0.0769522	0.000178719	0.245394	0.000339387	25.1948	1.23825
2	500	No	44	0.0703563	0.000125204	0.234731	0.000354613	25.4711	1.25642
2	500	No	45	0.0671329	8.90817e-05	0.225013	0.000328905	25.7382	1.31046
2	500	No	46	0.0612788	6.59429e-05	0.215086	0.000318794	25.9984	1.34229
2	500	No	47	0.0560093	5.9921e-05	0.207014	0.000284082	26.2376	1.38377
2	500	No	48	0.0526974	4.78369e-05	0.198514	0.00029085	26.4762	1.41255
2	500	No	49	0.0506908	9.5581e-05	0.190544	0.000310826	26.7116	1.42532
2	500	No	50	0.0477666	8.16297e-05	0.182324	0.000300719	26.943	1.44169
2	500	No	51	0.042854	5.59279e-05	0.173857	0.000292512	27.1623	1.47308
2	500	No	52	0.0393086	5.8479e-05	0.166434	0.000290446	27.3718	1.49198
2	500	No	53	0.0349987	5.04032e-05	0.158187	0.000303611	27.5661	1.50737
2	500	No	54	0.0313881	3.4434e-05	0.151249	0.000337843	27.7536	1.53765
2	500	No	55	0.0278528	2.74601e-05	0.144756	0.000338622	27.9299	1.57052
2	500	No	56	0.0253701	2.37462e-05	0.137502	0.000348657	28.0988	1.58024
2	500	No	57	0.0229329	2.39734e-05	0.13053	0.000411637	28.2568	1.60493
2	500	No	58	0.0204989	2.07694e-05	0.123744	0.000403743	28.4066	1.64091
2	500	No	59	0.0183172	1.70351e-05	0.117243	0.000376609	28.5468	1.65895
2	500	No	60	0.0163111	1.56895e-05	0.111888	0.000363992	28.6802	1.6796
2	500	No	61	0.0142489	1.03619e-05	0.106023	0.000343587	28.8099	1.7058
2	500	No	62	0.0131903	9.83329e-06	0.100721	0.000343847	28.9296	1.73298
2	500	No	63	0.0122357	8.99183e-06	0.0948345	0.000294307	29.0434	1.76885
2	500	No	64	0.0109332	8.52771e-06	0.0897202	0.000270239	29.1553	1.78328
2	500	No	65	0.00977008	7.59519e-06	0.0845645	0.000239495	29.2614	1.79856
2	500	No	66	0.00902432	5.97307e-06	0.080298	0.000204714	29.3566	1.81062
2	500	No	67	0.00796332	4.31346e-06	0.075755	0.000184117	29.4495	1.83199
2	500	No	68	0.00683268	2.99003e-06	0.0716923	0.000179552	29.5367	1.84794
2	500	No	69	0.00623865	2.30426e-06	0.0668817	0.000157304	29.6181	1.86315
2	500	No	70	0.00549117	2.04488e-06	0.0625818	0.000133809	29.6951	1.86944
2	500	No	71	0.00466752	1.31938e-06	0.0587906	0.00011232	29.767	1.87679
2	500	No	72	0.00415088	1.22299e-06	0.0553921	0.00011238	29.8336	1.88191
2	500	No	73	0.00362917	8.35641e-07	0.0511036	0.000100091	29.8958	1.88278
2	500	No	74	0.00315071	7.0292e-07	0.0475769	0.000100573	29.9556	1.88592
2	500	No	75	0.00266199	4.75063e-07	0.0439264	9.23077e-05	30.0101	1.88743
2	500	No	76	0.00231151	4.13521e-07	0.0407166	8.69598e-05	30.0602	1.89015
2	500	No	77	0.00189737	3.32611e-07	0.0373778	8.00161e-05	30.1067	1.88874
2	500	No	78	0.00155018	3.28704e-07	0.034591	8.47213e-05	30.1487	1.89205
2	500	No	79	0.00133059	3.6865e-07	0.0319574	8.61456e-05	30.1846	1.89435
2	500	No	80	0.00105362	2.77811e-07	0.03011	9.03579e-05	30.2189	1.89675
2	500	No	81	0.00087136	2.50288e-07	0.0280334	9.47107e-05	30.2486	1.89906
2	500	Yes	1	1	0	1	0	0	0
2	500	Yes	2	0.962311	0.00258217	0.974899	1.84431e-05	1.02262	0.00172652
2	500	Yes	3	0.899511	0.00236175	0.950218	7.22249e-05	1.98788	0.00430218
2	500	Yes	4	0.847032	0.00445438	0.925867	0.000117903	2.92364	0.0109184
2	500	Yes	5	0.818213	0.00394893	0.901153	0.000174713	3.85065	0.0164765
2	500	Yes	6	0.78126	0.00344325	0.876782	0.000285922	4.79468	0.0204075
2	500	Yes	7	0.75514	0.00383712	0.851914	0.000491944	5.70222	0.0313984
2	500	Yes	8	0.694898	0.00237122	0.829041	0.00056946	6.57865	0.033511
2	500	Yes	9	0.683146	0.00646955	0.808669	0.000636469	7.42954	0.0424104
2	500	Yes	10	0.639699	0.00462852	0.785725	0.000730539	8.27143	0.0643336
2	500	Yes	11	0.624294	0.00420527	0.764875	0.000871608	9.08015	0.0698268
2	500	Yes	12	0.586898	0.00571907	0.743139	0.000878717	9.87083	0.0828341
2	500	Yes	13	0.568912	0.00508716	0.721948	0.00092194	10.6539	0.0870511
2	500	Yes	14	0.542988	0.00261208	0.701844	0.000923846	11.4447	0.103439
2	500	Yes	15	0.511572	0.00405512	0.682175	0.000995517	12.2117	0.130422
2	500	Yes	16	0.491783	0.00539393	0.663573	0.000967406	12.945	0.153358
2	500	Yes	17	0.465161	0.00592728	0.64634	0.000917627	13.6591	0.193611
2	500	Yes	18	0.455422	0.00451421	0.630947	0.000958283	14.3571	0.235969
2	500	Yes	19	0.430944	0.00493859	0.61473	0.00107937	15.0456	0.299537
2	500	Yes	20	0.432036	0.00450234	0.598006	0.00112001	15.726	0.351431
2	500	Yes	21	0.402733	0.00348001	0.581202	0.0010499	16.3993	0.416017
2	500	Yes	22	0.399934	0.00379608	0.56738	0.00104105	17.0353	0.489448
2	500	Yes	23	0.391066	0.00351084	0.552726	0.00094547	17.6771	0.539995
2	500	Yes	24	0.377262	0.00436974	0.537796	0.000877735	18.3103	0.617157
2	500	Yes	25	0.359411	0.00525789	0.523354	0.000721862	18.9215	0.696248
2	500	Yes	26	0.358922	0.00417256	0.509309	0.000787587	19.5215	0.804797
2	500	Yes	27	0.33618	0.00392177	0.494711	0.000784273	20.126	0.886008
2	500	Yes	28	0.322963	0.00382633	0.481421	0.000710872	20.7192	1.00946
2	500	Yes	29	0.309362	0.00277243	0.46833	0.000571958	21.2894	1.12108
2	500	Yes	30	0.295991	0.00247387	0.454157	0.000519088	21.8604	1.23596
2	500	Yes	31	0.292987	0.0020123	0.442763	0.00049802	22.4071	1.32452
2	500	Yes	32	0.290459	0.00171536	0.432449	0.000491888	22.9465	1.42963
2	500	Yes	33	0.276411	0.00155132	0.422194	0.000568975	23.4993	1.48566
2	500	Yes	34	0.265912	0.00112285	0.409494	0.00056176	24.0398	1.54907
2	500	Yes	35	0.26606	0.00146343	0.399107	0.000517899	24.5578	1.5988
2	500	Yes	36	0.24656	0.00148277	0.388526	0.000411507	25.1015	1.65398
2	500	Yes	37	0.256088	0.00198026	0.377197	0.000391291	25.5935	1.72729
2	500	Yes	38	0.242737	0.00146198	0.365833	0.00037431	26.1081	1.84398
2	500	Yes	39	0.231018	0.0017635	0.355115	0.000331744	26.6218	1.94732
2	500	Yes	40	0.231107	0.00127198	0.345521	0.000358906	27.1054	2.05584
2	500	Yes	41	0.214944	0.00106322	0.336456	0.000313553	27.6176	2.14406
2	500	Yes	42	0.216364	0.000794435	0.325068	0.000287436	28.0877	2.22341
2	500	Yes	43	0.201472	0.000832537	0.315158	0.000251547	28.5655	2.30792
2	500	Yes	44	0.208836	0.000987911	0.307368	0.00028578	29.0176	2.35745
2	500	Yes	45	0.204473	0.00105524	0.296892	0.000256884	29.4881	2.46607
2	500	Yes	46	0.188195	0.000944329	0.288439	0.000262673	29.956	2.54134
2	500	Yes	47	0.184372	0.000681555	0.280633	0.000270751	30.3917	2.61216
2	500	Yes	48	0.17813	0.000781605	0.27309	0.00025687	30.8205	2.71096
2	500	Yes	49	0.175393	0.000902787	0.265209	0.000250622	31.2502	2.7839
2	500	Yes	50	0.171868	0.000897731	0.257329	0.000283784	31.6765	2.86929
2	500	Yes	51	0.166523	0.000746523	0.249101	0.000292344	32.1105	2.97487
2	500	Yes	52	0.156664	0.000529579	0.241619	0.000260089	32.5233	3.07887
2	500	Yes	53	0.157145	0.0007373	0.233448	0.000253136	32.9124	3.11076
2	500	Yes	54	0.150179	0.000738991	0.225878	0.000257032	33.3209	3.17485
2	500	Yes	55	0.143807	0.000642234	0.217337	0.000254824	33.7114	3.28157
2	500	Yes	56	0.133176	0.000442527	0.210732	0.00027893	34.0858	3.39107
2	500	Yes	57	0.129816	0.00038811	0.204438	0.000302336	34.4506	3.49456
2	500	Yes	58	0.119896	0.000293638	0.19734	0.000285671	34.8087	3.5518
2	500	Yes	59	0.118923	0.000464985	0.190195	0.000316177	35.1603	3.6578
2	500	Yes	60	0.111864	0.000474336	0.185321	0.000341898	35.5098	3.80411
2	500	Yes	61	0.10533	0.000303868	0.178694	0.000313075	35.856	3.8947
2	500	Yes	62	0.101366	0.000314593	0.172474	0.000326848	36.1858	3.97976
2	500	Yes	63	0.0972267	0.000348028	0.167027	0.000361279	36.5028	4.05941
2	500	Yes	64	0.0896219	0.00024302	0.161424	0.000317553	36.8255	4.11909
2	500	Yes	65	0.0869243	0.000170435	0.156416	0.000306025	37.127	4.20789
2	500	Yes	66	0.0871527	0.000228705	0.151228	0.000310298	37.4235	4.29665
2	500	Yes	67	0.0801369	0.000153363	0.146274	0.000278846	37.7255	4.40955
2	500	Yes	68	0.0767093	0.000162518	0.141387	0.000268376	38.0114	4.48088
2	500	Yes	69	0.0761211	0.000103618	0.136778	0.000277827	38.2929	4.5892
2	500	Yes	70	0.0732988	0.000136928	0.131897	0.000259757	38.5799	4.66408
2	500	Yes	71	0.0717669	0.000144561	0.127224	0.000266523	38.8557	4.73114
2	500	Yes	72	0.0690684	0.000146711	0.122967	0.000271618	39.1371	4.80245
2	500	Yes	73	0.0689027	0.00018193	0.119426	0.000271625	39.4013	4.91015
2	500	Yes	74	0.0640237	0.000207925	0.115174	0.000259995	39.6683	4.97611
2	500	Yes	75	0.0622649	0.000200793	0.111165	0.000235011	39.9172	5.07069
2	500	Yes	76	0.0598712	0.000195992	0.107668	0.000227024	40.1663	5.13955
2	500	Yes	77	0.0557345	0.000172233	0.104177	0.000223722	40.4162	5.26604
2	500	Yes	78	0.0556399	0.000179454	0.101166	0.000194029	40.6527	5.38241
2	500	Yes	79	0.0549235	0.00018902	0.0985349	0.000188715	40.8851	5.47235
2	500	Yes	80	0.053204	0.000144831	0.0959463	0.000175962	41.117	5.56281
2	500	Yes	81	0.0507958	0.000177603	0.0926272	0.00017112	41.3466	5.63022
2	1000	No	1	1	0	1	0	0	0
2	1000	No	2	0.96109	0.00720342	0.97696	2.61291e-05	1.00553	0.00115245
2	1000	No	3	0.906896	0.00271172	0.955343	4.02471e-05	1.97529	0.0063388
2	1000	No	4	0.889208	0.0043508	0.932057	6.1186e-05	2.94293	0.0122343
2	1000	No	5	0.82796	0.002816	0.910852	0.000101231	3.896	0.019319
2	1000	No	6	0.802537	0.00519754	0.889594	0.000148719	4.82127	0.0294665
2	1000	No	7	0.771712	0.00528805	0.866643	0.000156265	5.74103	0.0362866
2	1000	No	8	0.705905	0.00477823	0.844929	0.000220156	6.63312	0.0465435
2	1000	No	9	0.68627	0.004194	0.826251	0.00022704	7.4762	0.0570805
2	1000	No	10	0.659313	0.0036304	0.804425	0.000253983	8.3111	0.0627423
2	1000	No	11	0.637919	0.00553154	0.783677	0.000285215	9.13014	0.0745232
2	1000	No	12	0.619855	0.00565354	0.764969	0.00026169	9.93265	0.11421
2	1000	No	13	0.580464	0.00485473	0.744856	0.000242818	10.7157	0.137951
2	1000	No	14	0.555883	0.00710534	0.725154	0.000281552	11.4859	0.178788
2	1000	No	15	0.53128	0.00505597	0.706085	0.000280449	12.2526	0.225032
2	1000	No	16	0.512941	0.0035457	0.688864	0.000289622	12.9604	0.257218
2	1000	No	17	0.480557	0.00436142	0.671866	0.000325446	13.6843	0.300462
2	1000	No	18	0.462661	0.00223493	0.652045	0.000279404	14.3817	0.348147
2	1000	No	19	0.441297	0.00277161	0.635287	0.000307896	15.0638	0.338383
2	1000	No	20	0.426183	0.0023018	0.616797	0.000277249	15.7289	0.37868
2	1000	No	21	0.411498	0.00201926	0.600956	0.000313437	16.3979	0.447769
2	1000	No	22	0.400854	0.0023108	0.587423	0.000364524	17.0284	0.489816
2	1000	No	23	0.385677	0.00212719	0.5708	0.00033793	17.6653	0.55574
2	1000	No	24	0.358861	0.00168833	0.555057	0.000423834	18.2986	0.577834
2	1000	No	25	0.351364	0.0021329	0.538654	0.000477954	18.9185	0.59031
2	1000	No	26	0.323661	0.00186743	0.522604	0.000525846	19.5201	0.625562
2	1000	No	27	0.321255	0.00182341	0.509672	0.000594917	20.0806	0.647772
2	1000	No	28	0.307793	0.00175918	0.496069	0.000577531	20.6401	0.657285
2	1000	No	29	0.290362	0.00153986	0.481634	0.000574012	21.2115	0.72054
2	1000	No	30	0.275338	0.0013022	0.468676	0.00060765	21.766	0.775141
2	1000	No	31	0.256521	0.0012361	0.454645	0.000681125	22.2949	0.814956
2	1000	No	32	0.254698	0.0016618	0.442438	0.000657587	22.8043	0.861996
2	1000	No	33	0.235548	0.0012113	0.429097	0.000695271	23.3145	0.91499
2	1000	No	34	0.229139	0.000913233	0.416325	0.000611323	23.8127	0.990428
2	1000	No	35	0.220907	0.00159568	0.403753	0.000613809	24.2872	1.03678
2	1000	No	36	0.209777	0.00131338	0.392249	0.000611477	24.7623	1.09477
2	1000	No	37	0.206904	0.000931672	0.380867	0.000530271	25.2121	1.16608
2	1000	No	38	0.190196	0.000881062	0.369622	0.000464567	25.6667	1.22981
2	1000	No	39	0.183059	0.000724599	0.357959	0.000410293	26.1254	1.2972
2	1000	No	40	0.174416	0.000797548	0.348062	0.000425356	26.5472	1.33263
2	1000	No	41	0.16263	0.000660608	0.337604	0.000436282	26.9734	1.38796
2	1000	No	42	0.154279	0.000528796	0.327333	0.000403902	27.3868	1.43839
2	1000	No	43	0.152986	0.000715368	0.316944	0.000407156	27.7866	1.50742
2	1000	No	44	0.14284	0.000663567	0.306382	0.000416971	28.18	1.60445
2	1000	No	45	0.132272	0.000565216	0.295719	0.000457772	28.5591	1.67651
2	1000	No	46	0.125815	0.00038658	0.284957	0.000433344	28.9283	1.73503
2	1000	No	47	0.12031	0.000340239	0.276377	0.000446354	29.2835	1.80423
2	1000	No	48	0.11597	0.000281609	0.267921	0.000469992	29.6422	1.85929
2	1000	No	49	0.111872	0.000264348	0.258931	0.00044412	29.9896	1.90628
2	1000	No	50	0.103942	0.000231364	0.25121	0.000480477	30.3229	1.95982
2	1000	No	51	0.098218	0.00013399	0.241932	0.000470198	30.6448	2.03387
2	1000	No	52	0.0951602	0.000197867	0.234313	0.000449881	30.9679	2.08468
2	1000	No	53	0.0904065	0.000157626	0.226327	0.000430327	31.2703	2.15413
2	1000	No	54	0.0864285	0.000215271	0.2181	0.000424339	31.5736	2.19354
2	1000	No	55	0.0791914	0.000209624	0.209191	0.000402886	31.8749	2.22286
2	1000	No	56	0.0747575	8.71297e-05	0.202629	0.000392839	32.1603	2.28055
2	1000	No	57	0.071769	0.000109287	0.194691	0.000350496	32.44	2.2937
2	1000	No	58	0.0682098	9.64967e-05	0.188332	0.000324493	32.7056	2.33972
2	1000	No	59	0.0656881	0.000127948	0.181005	0.000285111	32.9689	2.38727
2	1000	No	60	0.0591836	7.93077e-05	0.174435	0.000276336	33.2294	2.44252
2	1000	No	61	0.0553035	6.05851e-05	0.167881	0.000251637	33.4731	2.50631
2	1000	No	62	0.053981	8.96905e-05	0.161104	0.000247007	33.7113	2.53757
2	1000	No	63	0.0498269	8.93429e-05	0.154738	0.000244583	33.9452	2.55362
2	1000	No	64	0.0457991	7.81895e-05	0.14843	0.000216749	34.1734	2.59303
2	1000	No	65	0.0433371	6.73713e-05	0.143448	0.000204038	34.3909	2.63036
2	1000	No	66	0.0401506	6.03216e-05	0.137885	0.000176942	34.6048	2.67854
2	1000	No	67	0.0381225	5.0729e-05	0.13278	0.000167772	34.8069	2.70159
2	1000	No	68	0.0356849	6.57988e-05	0.12685	0.00017176	34.9992	2.73093
2	1000	No	69	0.03187	4.2679e-05	0.121942	0.000165884	35.1873	2.76209
2	1000	No	70	0.0301865	3.53152e-05	0.1163	0.000155141	35.3639	2.80334
2	1000	No	71	0.0277934	2.46061e-05	0.111379	0.000137589	35.5345	2.83236
2	1000	No	72	0.0265285	2.27214e-05	0.106855	0.000108848	35.7027	2.86937
2	1000	No	73	0.0255789	2.81787e-05	0.102313	9.63872e-05	35.8668	2.89856
2	1000	No	74	0.0239457	2.22509e-05	0.0976039	9.20533e-05	36.0288	2.94191
2	1000	No	75	0.0218562	2.34751e-05	0.093035	8.83191e-05	36.1853	2.96247
2	1000	No	76	0.0201685	2.11387e-05	0.0888608	8.04796e-05	36.3316	3.00201
2	1000	No	77	0.0186405	1.68681e-05	0.084902	7.08944e-05	36.4735	3.01294
2	1000	No	78	0.017509	2.17152e-05	0.0810381	6.83751e-05	36.6099	3.03854
2	1000	No	79	0.0166272	1.85452e-05	0.0772039	6.18606e-05	36.7417	3.06764
2	1000	No	80	0.0152229	1.72684e-05	0.073308	6.02401e-05	36.8712	3.09279
2	1000	No	81	0.0141845	1.87632e-05	0.0697408	6.06278e-05	36.994	3.1231
2	1000	Yes	1	1	0	1	0	0	0
2	1000	Yes	2	0.946276	0.00144776	0.977044	2.59157e-05	1.00901	0.00161548
2	1000	Yes	3	0.894871	0.00478822	0.953298	2.20875e-05	1.99954	0.00251694
2	1000	Yes	4	0.864667	0.00477881	0.933378	3.22291e-05	2.95815	0.00592633
2	1000	Yes	5	0.828633	0.00335485	0.912329	5.28999e-05	3.86775	0.0120396
2	1000	Yes	6	0.777354	0.00241757	0.891837	8.07947e-05	4.81556	0.0198133
2	1000	Yes	7	0.775047	0.00392414	0.871495	8.1142e-05	5.71424	0.0198169
2	1000	Yes	8	0.718901	0.00165813	0.85003	8.58933e-05	6.6188	0.0277705
2	1000	Yes	9	0.701341	0.00767044	0.830281	0.000103679	7.47748	0.0376309
2	1000	Yes	10	0.678033	0.00301087	0.809229	0.000182995	8.3053	0.0518152
2	1000	Yes	11	0.658071	0.0055642	0.786484	0.00025321	9.14992	0.0582774
2	1000	Yes	12	0.637302	0.00505678	0.767182	0.000332645	9.97076	0.0657917
2	1000	Yes	13	0.590707	0.00378289	0.748128	0.00045619	10.7935	0.0797507
2	1000	Yes	14	0.565133	0.00419588	0.729375	0.00055288	11.5573	0.11509
2	1000	Yes	15	0.530189	0.00331092	0.710803	0.000521195	12.3351	0.147253
2	1000	Yes	16	0.52539	0.0035429	0.693617	0.000574148	13.0916	0.171988
2	1000	Yes	17	0.512234	0.00364222	0.67528	0.000663535	13.8476	0.202909
2	1000	Yes	18	0.49286	0.00204683	0.658546	0.000656907	14.5739	0.245787
2	1000	Yes	19	0.478691	0.00315768	0.639662	0.000757006	15.2921	0.267354
2	1000	Yes	20	0.460284	0.00375822	0.622643	0.000904238	15.9818	0.297354
2	1000	Yes	21	0.443699	0.00240434	0.607079	0.00103774	16.6857	0.361172
2	1000	Yes	22	0.424131	0.00288776	0.589876	0.00119737	17.353	0.376799
2	1000	Yes	23	0.40832	0.0022925	0.575524	0.00123074	17.9972	0.399844
2	1000	Yes	24	0.379188	0.00210976	0.56024	0.00135245	18.6541	0.43142
2	1000	Yes	25	0.364883	0.00277086	0.545701	0.00135594	19.2791	0.470065
2	1000	Yes	26	0.358302	0.00205837	0.532805	0.00138406	19.8902	0.520705
2	1000	Yes	27	0.342065	0.00293826	0.517609	0.00138222	20.5032	0.54752
2	1000	Yes	28	0.321028	0.00208105	0.502557	0.0012608	21.0986	0.591719
2	1000	Yes	29	0.310823	0.00331477	0.487826	0.00120295	21.6805	0.620634
2	1000	Yes	30	0.297558	0.00257173	0.473956	0.00113273	22.2535	0.687443
2	1000	Yes	31	0.287279	0.00220196	0.46037	0.000966146	22.8097	0.736438
2	1000	Yes	32	0.27042	0.00241589	0.447223	0.000915517	23.3511	0.7839
2	1000	Yes	33	0.255775	0.0015052	0.434831	0.000814514	23.8701	0.816168
2	1000	Yes	34	0.250034	0.0014066	0.423717	0.000759315	24.3838	0.875
2	1000	Yes	35	0.236899	0.00139213	0.410959	0.000699083	24.8965	0.933424
2	1000	Yes	36	0.233602	0.00117312	0.399033	0.000680225	25.3954	0.987926
2	1000	Yes	37	0.228495	0.00128636	0.386689	0.000635386	25.8738	1.05588
2	1000	Yes	38	0.216354	0.000976407	0.375235	0.000556087	26.3463	1.1126
2	1000	Yes	39	0.210203	0.00113271	0.364374	0.000505953	26.8208	1.17635
2	1000	Yes	40	0.201883	0.000913379	0.354418	0.0004722	27.2876	1.27626
2	1000	Yes	41	0.19318	0.00132082	0.345186	0.000496736	27.7562	1.36266
2	1000	Yes	42	0.187328	0.00137487	0.335383	0.000450048	28.2041	1.48526
2	1000	Yes	43	0.180814	0.00142327	0.325963	0.000513335	28.6532	1.56948
2	1000	Yes	44	0.175962	0.00124328	0.317226	0.000497773	29.0913	1.65732
2	1000	Yes	45	0.166874	0.00120785	0.308091	0.000478292	29.5113	1.75087
2	1000	Yes	46	0.16532	0.00102922	0.299803	0.000442315	29.9305	1.84011
2	1000	Yes	47	0.16326	0.0010329	0.292415	0.000424585	30.3334	1.93684
2	1000	Yes	48	0.15794	0.000738787	0.284733	0.000395868	30.7426	2.0108
2	1000	Yes	49	0.153551	0.00110542	0.277183	0.000387223	31.1394	2.08454
2	1000	Yes	50	0.14684	0.000793797	0.269483	0.000361659	31.5269	2.20752
2	1000	Yes	51	0.142179	0.000758396	0.262208	0.000381845	31.9087	2.29265
2	1000	Yes	52	0.145288	0.000814687	0.254088	0.000384965	32.2892	2.39512
2	1000	Yes	53	0.135102	0.000534949	0.246464	0.000333011	32.6712	2.49488
2	1000	Yes	54	0.130541	0.000410966	0.240238	0.000297535	33.0359	2.58838
2	1000	Yes	55	0.125283	0.000383518	0.234036	0.000267553	33.4009	2.643
2	1000	Yes	56	0.121959	0.000364402	0.227712	0.000250548	33.7521	2.70375
2	1000	Yes	57	0.11567	0.000307183	0.220346	0.000239213	34.1112	2.80077
2	1000	Yes	58	0.112677	0.000216813	0.21429	0.00022477	34.4567	2.83106
2	1000	Yes	59	0.110233	0.000165566	0.208211	0.000202256	34.7895	2.87143
2	1000	Yes	60	0.106049	0.000166849	0.202165	0.000172443	35.1229	2.893
2	1000	Yes	61	0.101347	8.99134e-05	0.195324	0.000155083	35.4682	2.90566
2	1000	Yes	62	0.0993561	0.000129857	0.18923	0.000151347	35.7857	2.9101
2	1000	Yes	63	0.0953479	0.000118121	0.182959	0.000148486	36.1107	2.92628
2	1000	Yes	64	0.0887457	2.25673e-05	0.177383	0.000147318	36.4279	2.9293
2	1000	Yes	65	0.0865108	7.76498e-06	0.172067	0.000144483	36.7236	2.9008
2	1000	Yes	66	0.0811648	1.70156e-05	0.166097	0.000150679	37.0185	2.93649
2	1000	Yes	67	0.0760298	1.58897e-05	0.159927	0.000145954	37.3008	2.9187
2	1000	Yes	68	0.0712974	3.92743e-05	0.154801	0.000181317	37.591	2.91536
2	1000	Yes	69	0.0713831	6.26825e-05	0.149723	0.000207766	37.8672	2.91151
2	1000	Yes	70	0.0710641	9.85615e-05	0.145165	0.000222221	38.13	2.91176
2	1000	Yes	71	0.0675681	0.000106379	0.139847	0.000241845	38.4052	2.90249
2	1000	Yes	72	0.0649892	0.000113324	0.134516	0.000239258	38.672	2.93372
2	1000	Yes	73	0.0630787	9.86585e-05	0.129898	0.000238939	38.9256	2.94238
2	1000	Yes	74	0.0595993	0.000108557	0.125293	0.000234919	39.1834	2.98034
2	1000	Yes	75	0.0575795	6.83173e-05	0.121331	0.0002255	39.4337	3.00392
2	1000	Yes	76	0.055206	8.79957e-05	0.117504	0.000207907	39.6765	3.06301
2	1000	Yes	77	0.0536564	7.92757e-05	0.114922	0.000202635	39.9146	3.09387
2	1000	Yes	78	0.0521744	7.9533e-05	0.111155	0.000179647	40.1463	3.11324
2	1000	Yes	79	0.050369	7.52446e-05	0.10727	0.000148127	40.378	3.11501
2	1000	Yes	80	0.0475833	5.73804e-05	0.103781	0.000143083	40.5982	3.12034
2	1000	Yes	81	0.0464861	7.85552e-05	0.100707	0.000156132	40.8132	3.11083
3	250	No	1	1	0	1	0	0	0
3	250	No	2	0.962111	0.00580609	0.978481	1.41049e-05	1.00705	0.00213328
3	250	No	3	0.931694	0.00581555	0.958119	2.38625e-05	1.98224	0.0086247
3	250	No	4	0.897298	0.00415062	0.94044	6.32582e-05	2.9446	0.0127054
3	250	No	5	0.854385	0.00320748	0.921616	0.000122485	3.87324	0.0156939
3	250	No	6	0.830138	0.00629121	0.901223	0.000207057	4.81713	0.012055
3	250	No	7	0.79133	0.00707333	0.882912	0.000271016	5.75256	0.0271068
3	250	No	8	0.76267	0.00502542	0.864783	0.000387401	6.67599	0.0315399
3	250	No	9	0.748899	0.00526133	0.846833	0.000515042	7.55506	0.0367287
3	250	No	10	0.733223	0.00737386	0.830013	0.000652391	8.44673	0.0526836
3	250	No	11	0.69824	0.0070332	0.813568	0.000670774	9.32118	0.0830165
3	250	No	12	0.65954	0.00752505	0.795821	0.000858722	10.1432	0.113021
3	250	No	13	0.645205	0.0103136	0.777945	0.000859604	10.9857	0.155788
3	250	No	14	0.613064	0.00625854	0.761533	0.000967474	11.8039	0.192231
3	250	No	15	0.597041	0.00621051	0.745302	0.001021	12.5922	0.252043
3	250	No	16	0.589674	0.00729042	0.727369	0.000942513	13.3998	0.324536
3	250	No	17	0.578135	0.00725209	0.711948	0.000887477	14.179	0.368276
3	250	No	18	0.554983	0.00701594	0.694242	0.000899982	14.9534	0.458888
3	250	No	19	0.51809	0.00561715	0.6777	0.00080055	15.7206	0.520234
3	250	No	20	0.516179	0.0060654	0.661317	0.000824288	16.4575	0.581002
3	250	No	21	0.503111	0.00654295	0.644846	0.000716107	17.1891	0.623019
3	250	No	22	0.47503	0.00583831	0.628756	0.000655699	17.9112	0.749802
3	250	No	23	0.4569	0.00657199	0.61395	0.000704319	18.6054	0.843053
3	250	No	24	0.443229	0.00604073	0.599622	0.000755347	19.3089	0.950957
3	250	No	25	0.440528	0.00458535	0.584686	0.000716038	19.9844	1.08496
3	250	No	26	0.430765	0.00364965	0.571316	0.000645048	20.661	1.17004
3	250	No	27	0.41648	0.00407625	0.557536	0.000669738	21.3215	1.25648
3	250	No	28	0.410272	0.00473021	0.543054	0.000617539	21.9724	1.34462
3	250	No	29	0.401263	0.00473829	0.529784	0.00056719	22.6135	1.4467
3	250	No	30	0.390097	0.00561108	0.51632	0.000562156	23.2523	1.57831
3	250	No	31	0.367118	0.00644013	0.501915	0.000507798	23.8906	1.71626
3	250	No	32	0.364632	0.00417605	0.489708	0.000539023	24.4742	1.83875
3	250	No	33	0.334674	0.00353079	0.477795	0.000511165	25.0897	1.97727
3	250	No	34	0.32482	0.0043841	0.465068	0.000492967	25.6754	2.1619
3	250	No	35	0.305153	0.00372853	0.453984	0.000464042	26.2617	2.31428
3	250	No	36	0.308721	0.00408257	0.441322	0.000443414	26.8288	2.42201
3	250	No	37	0.293178	0.0025257	0.430092	0.000415639	27.3815	2.56681
3	250	No	38	0.279087	0.00186962	0.416884	0.000426635	27.9227	2.71756
3	250	No	39	0.265717	0.0017397	0.405212	0.000450131	28.4686	2.84998
3	250	No	40	0.259707	0.00214933	0.394267	0.000455598	29.0041	2.99138
3	250	No	41	0.244687	0.0022406	0.38408	0.000467014	29.5166	3.08399
3	250	No	42	0.243687	0.00180112	0.374081	0.00047148	29.9988	3.19279
3	250	No	43	0.23834	0.00199771	0.363916	0.000494214	30.4921	3.33248
3	250	No	44	0.235569	0.00223764	0.353997	0.000465297	30.9861	3.47096
3	250	No	45	0.224758	0.00218223	0.344815	0.000431366	31.4755	3.64519
3	250	No	46	0.210092	0.00163072	0.335966	0.000466581	31.9628	3.80279
3	250	No	47	0.210086	0.00197899	0.327185	0.000490669	32.4199	3.91484
3	250	No	48	0.20124	0.00144159	0.31933	0.000512519	32.8653	4.03392
3	250	No	49	0.187718	0.000964164	0.31005	0.000512946	33.3168	4.1701
3	250	No	50	0.180376	0.00131513	0.30198	0.000524017	33.7541	4.35949
3	250	No	51	0.175189	0.00119461	0.293472	0.000529938	34.1822	4.53099
3	250	No	52	0.168032	0.00106205	0.285021	0.000541317	34.6079	4.67352
3	250	No	53	0.159433	0.000875607	0.276765	0.000554945	35.024	4.80959
3	250	No	54	0.161236	0.00109346	0.268996	0.000486271	35.4272	4.96278
3	250	No	55	0.152661	0.0011208	0.260167	0.00046783	35.8341	5.07484
3	250	No	56	0.14635	0.000789818	0.252321	0.000434642	36.2225	5.24859
3	250	No	57	0.143682	0.000652746	0.245783	0.00043134	36.6047	5.33938
3	250	No	58	0.136714	0.000461709	0.238083	0.000371448	36.9772	5.43115
3	250	No	59	0.135289	0.00060606	0.230601	0.000312864	37.3539	5.57796
3	250	No	60	0.12945	0.000523197	0.223767	0.000293995	37.7268	5.71779
3	250	No	61	0.126214	0.000493922	0.217872	0.000268381	38.0839	5.82957
3	250	No	62	0.120793	0.000617685	0.211293	0.000270359	38.45	5.90892
3	250	No	63	0.117302	0.000454905	0.205653	0.000249409	38.8056	6.03381
3	250	No	64	0.115984	0.000572188	0.200063	0.000238959	39.1624	6.17293
3	250	No	65	0.10599	0.000390488	0.194375	0.000234705	39.505	6.38331
3	250	No	66	0.106785	0.000383981	0.188328	0.000218351	39.8315	6.50069
3	250	No	67	0.103252	0.000359965	0.182418	0.000219454	40.1598	6.62882
3	250	No	68	0.097667	0.00024498	0.176868	0.000212932	40.4838	6.78385
3	250	No	69	0.0960077	0.000260949	0.172146	0.000202268	40.8007	6.87614
3	250	No	70	0.0920936	0.000239666	0.167659	0.000189277	41.1118	7.02895
3	250	No	71	0.0897329	0.000223345	0.162876	0.000174963	41.4207	7.17996
3	250	No	72	0.0831752	0.000180239	0.157367	0.000166019	41.7227	7.26769
3	250	No	73	0.0834812	0.00017845	0.152576	0.000163229	42.0074	7.32602
3	250	No	74	0.0796906	0.000140616	0.148287	0.000136003	42.2987	7.44568
3	250	No	75	0.0775137	0.000121687	0.143646	0.000127672	42.5844	7.52674
3	250	No	76	0.0754639	0.000108433	0.139895	0.000129037	42.8771	7.64756
3	250	No	77	0.0711548	0.000161121	0.135603	0.000114012	43.1569	7.7383
3	250	No	78	0.0677395	0.000131202	0.131452	0.000107256	43.4291	7.84214
3	250	No	79	0.0657493	0.000118874	0.127233	9.76258e-05	43.6864	7.91524
3	250	No	80	0.063678	6.84905e-05	0.124106	9.53506e-05	43.944	8.0363
3	250	No	81	0.0620733	7.50072e-05	0.120186	7.89647e-05	44.2091	8.15258
3	250	Yes	1	1	0	1	0	0	0
3	250	Yes	2	0.961214	0.00407351	0.978756	1.3321e-05	1.00583	0.00253669
3	250	Yes	3	0.91866	0.00542896	0.958225	2.84612e-05	2.00303	0.00775805
3	250	Yes	4	0.900405	0.00528982	0.937005	9.16142e-05	2.96126	0.00705552
3	250	Yes	5	0.852542	0.00812413	0.91638	0.000125021	3.90607	0.0187843
3	250	Yes	6	0.82776	0.0066041	0.896768	0.000199143	4.85953	0.0350673
3	250	Yes	7	0.775902	0.00545276	0.877669	0.000229288	5.76341	0.0436743
3	250	Yes	8	0.723733	0.00873439	0.859153	0.000362712	6.66031	0.074882
3	250	Yes	9	0.700109	0.00625305	0.840402	0.000390669	7.51975	0.112821
3	250	Yes	10	0.707291	0.00864874	0.822736	0.000453595	8.37096	0.152201
3	250	Yes	11	0.670334	0.00792804	0.805035	0.000430793	9.21391	0.224243
3	250	Yes	12	0.649953	0.00917291	0.787393	0.000518706	10.0521	0.266314
3	250	Yes	13	0.624863	0.0106115	0.770485	0.000566274	10.8818	0.34098
3	250	Yes	14	0.601571	0.00896563	0.752804	0.000577301	11.6715	0.394041
3	250	Yes	15	0.582774	0.00570448	0.735782	0.000668667	12.4395	0.464426
3	250	Yes	16	0.567657	0.00836986	0.720362	0.000718343	13.1903	0.556985
3	250	Yes	17	0.544283	0.00625289	0.702688	0.000740524	13.9429	0.631767
3	250	Yes	18	0.523192	0.00785855	0.685887	0.000677061	14.6915	0.684115
3	250	Yes	19	0.500524	0.00736662	0.66968	0.000642034	15.418	0.779824
3	250	Yes	20	0.48204	0.00673567	0.652793	0.00062373	16.1445	0.869028
3	250	Yes	21	0.473216	0.0057322	0.636464	0.000616911	16.8423	0.997814
3	250	Yes	22	0.463737	0.00534598	0.619559	0.00052563	17.5345	1.11824
3	250	Yes	23	0.438093	0.00503834	0.603885	0.000541817	18.2182	1.25734
3	250	Yes	24	0.422938	0.00538785	0.587078	0.000545819	18.8811	1.31667
3	250	Yes	25	0.397211	0.00531598	0.570784	0.000524704	19.5336	1.41479
3	250	Yes	26	0.380006	0.00615291	0.555585	0.000534185	20.1586	1.5314
3	250	Yes	27	0.366216	0.0046325	0.539698	0.00049877	20.7848	1.64717
3	250	Yes	28	0.35092	0.00457726	0.524845	0.000541306	21.3923	1.74179
3	250	Yes	29	0.337687	0.00423905	0.510222	0.000592875	21.9821	1.89958
3	250	Yes	30	0.309987	0.00310306	0.495564	0.000581653	22.5684	2.05437
3	250	Yes	31	0.296166	0.00368391	0.480605	0.000634191	23.1252	2.17106
3	250	Yes	32	0.28498	0.0028536	0.466874	0.000629611	23.6649	2.34787
3	250	Yes	33	0.26596	0.0034504	0.453097	0.000711754	24.2037	2.49292
3	250	Yes	34	0.25221	0.00263215	0.438934	0.000699767	24.7129	2.6542
3	250	Yes	35	0.238883	0.00341358	0.425132	0.000719547	25.2284	2.81077
3	250	Yes	36	0.223797	0.00217097	0.412379	0.000642796	25.732	3.02074
3	250	Yes	37	0.209781	0.00150945	0.398007	0.000557642	26.2054	3.19418
3	250	Yes	38	0.1971	0.00156502	0.387657	0.000548408	26.6535	3.33477
3	250	Yes	39	0.185827	0.00140869	0.375046	0.000543251	27.1027	3.49484
3	250	Yes	40	0.179829	0.00163941	0.363259	0.000528692	27.5256	3.62182
3	250	Yes	41	0.165388	0.00194519	0.351101	0.000491616	27.96	3.80027
3	250	Yes	42	0.15988	0.00161625	0.339545	0.000414523	28.3639	4.02146
3	250	Yes	43	0.150419	0.00138187	0.328755	0.000368189	28.764	4.1947
3	250	Yes	44	0.143209	0.00129053	0.317967	0.000313513	29.1466	4.37743
3	250	Yes	45	0.131456	0.00109796	0.307518	0.000298798	29.5259	4.59955
3	250	Yes	46	0.125045	0.000834381	0.297664	0.00028358	29.8911	4.82577
3	250	Yes	47	0.118605	0.000996285	0.28752	0.000269398	30.2413	4.98262
3	250	Yes	48	0.109695	0.000574939	0.27811	0.000233413	30.5618	5.17513
3	250	Yes	49	0.102029	0.000561395	0.267738	0.000196835	30.8985	5.31134
3	250	Yes	50	0.0949248	0.000502528	0.257866	0.000159012	31.2239	5.44583
3	250	Yes	51	0.0877782	0.0004606	0.248266	0.000180443	31.5274	5.60046
3	250	Yes	52	0.0793067	0.000439684	0.238953	0.000193574	31.8246	5.73667
3	250	Yes	53	0.073343	0.000431359	0.229086	0.000201575	32.1001	5.90849
3	250	Yes	54	0.0674454	0.000290834	0.22012	0.000224434	32.3725	6.08068
3	250	Yes	55	0.0646617	0.000261181	0.211293	0.000210907	32.6235	6.2195
3	250	Yes	56	0.0574798	0.000214853	0.200904	0.000226945	32.8754	6.35056
3	250	Yes	57	0.0521819	0.000246596	0.192272	0.000221412	33.1101	6.47618
3	250	Yes	58	0.0462745	0.000158672	0.183972	0.000186112	33.3344	6.63192
3	250	Yes	59	0.0430213	0.000120836	0.175036	0.000195711	33.5464	6.74442
3	250	Yes	60	0.0400125	0.000127258	0.167279	0.000208898	33.7516	6.9069
3	250	Yes	61	0.0354556	7.89102e-05	0.159653	0.000180064	33.9473	7.01572
3	250	Yes	62	0.0321703	8.00673e-05	0.151753	0.000180719	34.1302	7.1069
3	250	Yes	63	0.0283269	6.93505e-05	0.14365	0.000157349	34.3159	7.21281
3	250	Yes	64	0.0244594	4.65411e-05	0.136057	0.000151617	34.4861	7.34152
3	250	Yes	65	0.0218666	3.38349e-05	0.129204	0.000154269	34.6367	7.44067
3	250	Yes	66	0.0201608	3.4597e-05	0.122815	0.000135396	34.7837	7.55582
3	250	Yes	67	0.0180933	3.68055e-05	0.117257	0.000126498	34.926	7.66171
3	250	Yes	68	0.0158943	3.01004e-05	0.111351	0.000130935	35.0592	7.76376
3	250	Yes	69	0.0138367	2.65838e-05	0.105717	0.000120161	35.1848	7.85375
3	250	Yes	70	0.0123168	1.74949e-05	0.100234	0.000109432	35.3003	7.95342
3	250	Yes	71	0.0108719	1.42516e-05	0.0951662	9.90118e-05	35.4073	8.02256
3	250	Yes	72	0.00952228	1.25217e-05	0.089817	8.20984e-05	35.5087	8.10151
3	250	Yes	73	0.00810483	8.0061e-06	0.0841945	7.5827e-05	35.6035	8.17981
3	250	Yes	74	0.00726904	7.49061e-06	0.0786048	6.77506e-05	35.6923	8.24472
3	250	Yes	75	0.00616984	4.84854e-06	0.0737676	6.80311e-05	35.7744	8.30472
3	250	Yes	76	0.00522259	4.00938e-06	0.0685755	6.89052e-05	35.8496	8.34903
3	250	Yes	77	0.00413829	2.43045e-06	0.0634319	6.19526e-05	35.9212	8.39946
3	250	Yes	78	0.00352717	1.7573e-06	0.058647	6.32722e-05	35.9832	8.454
3	250	Yes	79	0.00300281	1.57646e-06	0.0543841	6.0504e-05	36.0392	8.49865
3	250	Yes	80	0.0023863	1.02186e-06	0.0501156	5.10271e-05	36.0906	8.54465
3	250	Yes	81	0.00192869	7.82243e-07	0.0462393	5.4084e-05	36.1348	8.57349
3	500	No	1	1	0	1	0	0	0
3	500	No	2	0.946007	0.0035072	0.980505	1.05667e-05	1.00933	0.00186402
3	500	No	3	0.898145	0.00320876	0.960891	1.72905e-05	1.98962	0.00429927
3	500	No	4	0.86743	0.00543824	0.940179	4.4996e-05	2.93164	0.00871668
3	500	No	5	0.8463	0.0086804	0.920363	7.27686e-05	3.88093	0.0174435
3	500	No	6	0.832728	0.00826415	0.902673	8.33756e-05	4.81541	0.0288093
3	500	No	7	0.796114	0.00939106	0.88417	9.03813e-05	5.75882	0.0406376
3	500	No	8	0.773394	0.00625961	0.866295	0.000140759	6.68572	0.0576561
3	500	No	9	0.75464	0.00553004	0.848749	0.000198139	7.57133	0.0851213
3	500	No	10	0.733657	0.00542341	0.830889	0.000236359	8.45157	0.101031
3	500	No	11	0.700617	0.00571606	0.812745	0.000276959	9.32029	0.111562
3	500	No	12	0.688094	0.00559518	0.794044	0.00031922	10.1601	0.133435
3	500	No	13	0.675235	0.00440186	0.775275	0.00039732	11.0369	0.170366
3	500	No	14	0.642697	0.00785375	0.75765	0.000503847	11.864	0.193434
3	500	No	15	0.61275	0.00777503	0.741458	0.000512524	12.6901	0.212777
3	500	No	16	0.590557	0.00822903	0.722965	0.000562851	13.4782	0.236498
3	500	No	17	0.588052	0.0115177	0.704579	0.000560032	14.27	0.287472
3	500	No	18	0.560192	0.00884172	0.686723	0.000510206	15.0446	0.361113
3	500	No	19	0.544647	0.00821182	0.670157	0.000463058	15.8183	0.428359
3	500	No	20	0.53291	0.00684564	0.654301	0.000451532	16.5327	0.491545
3	500	No	21	0.503802	0.00419378	0.63868	0.000517408	17.2811	0.575874
3	500	No	22	0.483692	0.00373107	0.622711	0.000493018	17.9962	0.626691
3	500	No	23	0.465483	0.0044249	0.607475	0.000474825	18.701	0.714268
3	500	No	24	0.449191	0.00270965	0.590665	0.00046302	19.3962	0.80042
3	500	No	25	0.430012	0.00270665	0.574925	0.00055669	20.0765	0.819169
3	500	No	26	0.416633	0.00306835	0.560923	0.000533056	20.7401	0.864727
3	500	No	27	0.403935	0.00194155	0.545941	0.000597745	21.4207	0.895321
3	500	No	28	0.393908	0.00160702	0.53286	0.000595437	22.08	0.923957
3	500	No	29	0.37413	0.0013728	0.520345	0.000586781	22.7128	1.01416
3	500	No	30	0.37057	0.00204399	0.506539	0.000560946	23.3249	1.0734
3	500	No	31	0.351021	0.00149557	0.493052	0.000585546	23.9512	1.17559
3	500	No	32	0.336997	0.00249624	0.480126	0.000646774	24.5443	1.23338
3	500	No	33	0.316384	0.00164371	0.469395	0.000531638	25.1547	1.30413
3	500	No	34	0.310193	0.00146212	0.459254	0.000571263	25.7053	1.36874
3	500	No	35	0.298432	0.00160704	0.448401	0.000568638	26.2742	1.4375
3	500	No	36	0.294677	0.00110803	0.436778	0.000540198	26.8451	1.52595
3	500	No	37	0.288081	0.0018655	0.426191	0.00057687	27.3959	1.61499
3	500	No	38	0.276373	0.00141937	0.416288	0.000545622	27.949	1.6594
3	500	No	39	0.267356	0.001148	0.405781	0.000529831	28.4915	1.71071
3	500	No	40	0.250044	0.000981055	0.394781	0.000537667	29.0217	1.73162
3	500	No	41	0.253042	0.000691788	0.384555	0.000521275	29.5538	1.76013
3	500	No	42	0.250195	0.000627209	0.374568	0.000536664	30.0598	1.849
3	500	No	43	0.24087	0.000916119	0.364926	0.000472358	30.5636	1.91997
3	500	No	44	0.22875	0.000886495	0.354873	0.000406757	31.0598	1.99708
3	500	No	45	0.218235	0.000497695	0.345833	0.000446474	31.5359	2.05922
3	500	No	46	0.218573	0.00084569	0.337119	0.000419381	32.0079	2.11531
3	500	No	47	0.209779	0.00116443	0.327284	0.000419985	32.4766	2.19752
3	500	No	48	0.211256	0.00104182	0.318299	0.000383231	32.9358	2.25758
3	500	No	49	0.204472	0.000693249	0.310411	0.000386655	33.3938	2.29749
3	500	No	50	0.198301	0.000985301	0.30195	0.000327288	33.8388	2.34868
3	500	No	51	0.186699	0.000701216	0.293172	0.000317841	34.2726	2.45954
3	500	No	52	0.180556	0.000525564	0.284565	0.000286445	34.7022	2.54058
3	500	No	53	0.173972	0.000426068	0.275455	0.000277357	35.1325	2.61983
3	500	No	54	0.172122	0.000448765	0.266383	0.000269607	35.5582	2.67693
3	500	No	55	0.161331	0.000390015	0.25775	0.000263415	35.9829	2.75064
3	500	No	56	0.153688	0.00027989	0.250059	0.000264707	36.392	2.82578
3	500	No	57	0.143643	0.000220785	0.242602	0.000269511	36.7903	2.87915
3	500	No	58	0.140399	0.00024895	0.235585	0.000266042	37.1724	2.9037
3	500	No	59	0.135285	0.000332455	0.229093	0.000261136	37.5562	2.92841
3	500	No	60	0.128517	0.000241706	0.222533	0.000280197	37.926	2.98037
3	500	No	61	0.129172	0.000417374	0.216119	0.00029509	38.2878	3.00619
3	500	No	62	0.121613	0.000304476	0.209568	0.00030327	38.6536	3.06649
3	500	No	63	0.117871	0.000172243	0.203057	0.000295876	39.0054	3.14501
3	500	No	64	0.109134	0.00016548	0.196994	0.000263587	39.3544	3.19146
3	500	No	65	0.10647	0.000145935	0.190994	0.00026632	39.6734	3.23122
3	500	No	66	0.103255	0.000118682	0.185893	0.000269733	40.0003	3.25109
3	500	No	67	0.0998313	7.03525e-05	0.180925	0.00029193	40.3297	3.287
3	500	No	68	0.0957204	8.80294e-05	0.176821	0.000292441	40.6449	3.29737
3	500	No	69	0.0911847	0.000152853	0.172402	0.000276565	40.9616	3.30769
3	500	No	70	0.0918105	0.000224745	0.168207	0.000267943	41.2702	3.35696
3	500	No	71	0.0884141	0.000191486	0.163783	0.000227763	41.5679	3.36537
3	500	No	72	0.0850319	0.000179016	0.159237	0.000188874	41.8717	3.42049
3	500	No	73	0.0833788	0.000110369	0.15498	0.000178567	42.1582	3.44083
3	500	No	74	0.0806278	0.000100245	0.150958	0.000186669	42.4497	3.49887
3	500	No	75	0.0782378	0.000147175	0.147052	0.000186039	42.7457	3.55931
3	500	No	76	0.076252	0.000178237	0.143399	0.000170292	43.0296	3.62115
3	500	No	77	0.0739064	0.000167535	0.139637	0.000173708	43.3024	3.66385
3	500	No	78	0.0708624	0.000176799	0.135871	0.000152755	43.5782	3.74175
3	500	No	79	0.0693213	0.000113194	0.132459	0.000146909	43.836	3.78436
3	500	No	80	0.0657976	0.000100777	0.128796	0.000141729	44.1025	3.81634
3	500	No	81	0.0655143	7.43673e-05	0.12588	0.000117698	44.3676	3.84017
3	500	Yes	1	1	0	1	0	0	0
3	500	Yes	2	0.959545	0.00571161	0.980579	8.28851e-06	1.02	0.00488599
3	500	Yes	3	0.92848	0.00932325	0.961326	2.2674e-05	2.00358	0.00480757
3	500	Yes	4	0.924506	0.00737611	0.941873	2.53672e-05	2.97963	0.0107254
3	500	Yes	5	0.884062	0.00970368	0.92169	3.54505e-05	3.94826	0.0119653
3	500	Yes	6	0.847517	0.00708719	0.902072	7.66584e-05	4.93652	0.021085
3	500	Yes	7	0.820961	0.00441041	0.880708	7.05887e-05	5.90045	0.0266476
3	500	Yes	8	0.789159	0.00325094	0.860071	9.01591e-05	6.84925	0.0569883
3	500	Yes	9	0.777903	0.00321293	0.84091	0.000112494	7.78059	0.0578214
3	500	Yes	10	0.746027	0.00374695	0.821394	0.000164337	8.66921	0.0679257
3	500	Yes	11	0.715383	0.00775924	0.802497	0.00016453	9.56497	0.0857859
3	500	Yes	12	0.696022	0.0103408	0.783996	0.000196452	10.4232	0.12041
3	500	Yes	13	0.649049	0.0107819	0.764649	0.000223735	11.2725	0.143672
3	500	Yes	14	0.627601	0.010653	0.745405	0.000308044	12.0854	0.163882
3	500	Yes	15	0.606974	0.0106342	0.727843	0.000348168	12.9071	0.211974
3	500	Yes	16	0.574351	0.00948714	0.711535	0.000387854	13.6857	0.261811
3	500	Yes	17	0.567322	0.00803005	0.695556	0.000355589	14.4636	0.31652
3	500	Yes	18	0.550267	0.00540871	0.677284	0.000406968	15.2425	0.378683
3	500	Yes	19	0.526249	0.00761686	0.659056	0.00053669	15.9975	0.417515
3	500	Yes	20	0.503876	0.00631444	0.642796	0.000555741	16.7301	0.465563
3	500	Yes	21	0.486157	0.00589037	0.627316	0.000634475	17.4646	0.559261
3	500	Yes	22	0.48426	0.00605856	0.611042	0.000580592	18.1724	0.65293
3	500	Yes	23	0.465969	0.00462561	0.592811	0.000542049	18.8712	0.749985
3	500	Yes	24	0.435558	0.00517642	0.576366	0.000590997	19.559	0.851167
3	500	Yes	25	0.416976	0.00514252	0.561436	0.000605552	20.2199	0.907185
3	500	Yes	26	0.393733	0.00394958	0.54673	0.000662474	20.8532	1.02501
3	500	Yes	27	0.38142	0.00254314	0.533026	0.000595688	21.5089	1.11913
3	500	Yes	28	0.37183	0.00296992	0.519177	0.000584911	22.1265	1.21842
3	500	Yes	29	0.352282	0.00327335	0.505013	0.000570882	22.7502	1.32522
3	500	Yes	30	0.348118	0.00297929	0.492277	0.000572846	23.3522	1.41436
3	500	Yes	31	0.330825	0.00243401	0.479327	0.000522489	23.943	1.51216
3	500	Yes	32	0.314115	0.00151596	0.467194	0.000485787	24.5129	1.65964
3	500	Yes	33	0.295656	0.00161622	0.452885	0.0004539	25.0862	1.79867
3	500	Yes	34	0.28955	0.00214025	0.441888	0.000425992	25.6548	1.90966
3	500	Yes	35	0.283025	0.00199979	0.429025	0.000404721	26.2049	2.02548
3	500	Yes	36	0.26938	0.00141476	0.417573	0.000421832	26.7511	2.17224
3	500	Yes	37	0.261131	0.00151778	0.405891	0.000419956	27.2678	2.26114
3	500	Yes	38	0.254815	0.00188766	0.395268	0.000450005	27.7734	2.35167
3	500	Yes	39	0.244092	0.000928282	0.383579	0.000437928	28.2876	2.47627
3	500	Yes	40	0.225792	0.00075563	0.373399	0.000428282	28.7736	2.55496
3	500	Yes	41	0.207241	0.000507079	0.361964	0.000432628	29.2585	2.63466
3	500	Yes	42	0.204903	0.000784413	0.351789	0.000428709	29.714	2.6716
3	500	Yes	43	0.192346	0.000554031	0.340709	0.000415895	30.1687	2.76085
3	500	Yes	44	0.181942	0.000468446	0.330193	0.000411722	30.6107	2.86967
3	500	Yes	45	0.171068	0.000623005	0.320422	0.000384414	31.0357	2.91526
3	500	Yes	46	0.162996	0.000559189	0.311125	0.000397779	31.4561	3.00683
3	500	Yes	47	0.155886	0.00048558	0.301664	0.000393054	31.8637	3.10419
3	500	Yes	48	0.149612	0.000545424	0.292009	0.000311284	32.2485	3.17278
3	500	Yes	49	0.145273	0.000373844	0.282423	0.000267529	32.6424	3.24475
3	500	Yes	50	0.133287	0.000330723	0.274402	0.000256931	33.0112	3.34704
3	500	Yes	51	0.128091	0.00033361	0.265421	0.000255686	33.3817	3.42207
3	500	Yes	52	0.122209	0.000284807	0.25692	0.000290131	33.7497	3.526
3	500	Yes	53	0.114843	0.000247424	0.248554	0.000278459	34.0904	3.60951
3	500	Yes	54	0.108584	0.000177176	0.24084	0.000269932	34.433	3.68902
3	500	Yes	55	0.100773	0.00013327	0.233503	0.000285253	34.7647	3.72079
3	500	Yes	56	0.0947349	0.00017501	0.226607	0.000302836	35.087	3.73123
3	500	Yes	57	0.0923615	0.000229425	0.219327	0.000302567	35.4027	3.75503
3	500	Yes	58	0.0873162	0.000158779	0.211522	0.000292119	35.7107	3.82102
3	500	Yes	59	0.0804841	0.00017059	0.205275	0.000254887	36.0074	3.8452
3	500	Yes	60	0.0811014	0.000178796	0.199027	0.00020249	36.2857	3.88572
3	500	Yes	61	0.0753726	0.000129476	0.192136	0.000174359	36.5785	3.85401
3	500	Yes	62	0.0714117	0.000146277	0.184804	0.000169254	36.8589	3.84096
3	500	Yes	63	0.0648938	0.000106746	0.177772	0.000186545	37.1294	3.86453
3	500	Yes	64	0.0628606	0.000118807	0.171026	0.000178052	37.3892	3.85547
3	500	Yes	65	0.0591268	9.72479e-05	0.164822	0.000177923	37.6429	3.85615
3	500	Yes	66	0.0570438	0.000128874	0.158754	0.000201069	37.8919	3.86327
3	500	Yes	67	0.0534301	0.00011128	0.15263	0.00021568	38.1378	3.8974
3	500	Yes	68	0.0495249	7.43806e-05	0.146412	0.000220705	38.373	3.92663
3	500	Yes	69	0.0469117	8.22052e-05	0.140337	0.000221674	38.6019	3.90465
3	500	Yes	70	0.0436314	5.80707e-05	0.133969	0.000237404	38.8245	3.90247
3	500	Yes	71	0.0408736	4.99658e-05	0.128115	0.000241132	39.0358	3.91592
3	500	Yes	72	0.0372559	4.90258e-05	0.12189	0.000264138	39.2426	3.91564
3	500	Yes	73	0.0347039	4.53209e-05	0.116816	0.000285572	39.427	3.92835
3	500	Yes	74	0.0323751	4.24487e-05	0.11238	0.000278723	39.6134	3.91996
3	500	Yes	75	0.0303316	3.01118e-05	0.107718	0.000265377	39.7936	3.92515
3	500	Yes	76	0.0277467	2.47468e-05	0.102914	0.000254011	39.9702	3.94548
3	500	Yes	77	0.0258123	2.96127e-05	0.09792	0.000232485	40.1436	3.96702
3	500	Yes	78	0.0236915	2.56935e-05	0.0937364	0.000214924	40.3031	3.98292
3	500	Yes	79	0.0218554	1.94093e-05	0.0900614	0.000204675	40.4573	3.97625
3	500	Yes	80	0.020293	2.06966e-05	0.0859262	0.000191745	40.6027	3.97918
3	500	Yes	81	0.0185929	1.30428e-05	0.0820776	0.000197858	40.7453	3.96288
3	1000	No	1	1	0	1	0	0	0
3	1000	No	2	1.0005	0.00224522	0.980849	9.67376e-06	0.995653	0.00157311
3	1000	No	3	0.957889	0.00948012	0.962234	3.61181e-05	2.00468	0.00556043
3	1000	No	4	0.924808	0.0039272	0.943516	5.66427e-05	2.98657	0.00779017
3	1000	No	5	0.87987	0.00462094	0.923272	7.85904e-05	3.9867	0.0173898
3	1000	No	6	0.840888	0.00374533	0.904	7.34835e-05	4.96508	0.0334473
3	1000	No	7	0.84172	0.00561216	0.882767	7.88871e-05	5.90164	0.0346236
3	1000	No	8	0.801605	0.00463417	0.863091	9.90481e-05	6.82198	0.0441221
3	1000	No	9	0.791011	0.00754632	0.843812	0.000141834	7.70977	0.0627547
3	1000	No	10	0.753328	0.007531	0.827238	0.000130897	8.5879	0.0909349
3	1000	No	11	0.701341	0.00349128	0.809846	0.000132848	9.45256	0.123325
3	1000	No	12	0.708382	0.00463188	0.791306	0.000111466	10.2905	0.150073
3	1000	No	13	0.668369	0.00264981	0.771866	0.000141465	11.1326	0.160714
3	1000	No	14	0.648573	0.00699275	0.75569	0.000159745	11.9645	0.181973
3	1000	No	15	0.638372	0.00548063	0.741074	0.000163109	12.7883	0.215088
3	1000	No	16	0.627271	0.0046649	0.722123	0.000204711	13.5997	0.259652
3	1000	No	17	0.582101	0.00368185	0.704275	0.00018305	14.4299	0.283065
3	1000	No	18	0.576245	0.00532158	0.687128	0.000232431	15.2227	0.318053
3	1000	No	19	0.553925	0.00422734	0.671495	0.000222773	15.9925	0.389332
3	1000	No	20	0.528994	0.00622295	0.654485	0.000231479	16.7471	0.424589
3	1000	No	21	0.505736	0.00535097	0.638865	0.000237829	17.4855	0.474926
3	1000	No	22	0.494455	0.00402004	0.623457	0.000190757	18.2229	0.528899
3	1000	No	23	0.485185	0.00259309	0.609369	0.000143442	18.9193	0.582662
3	1000	No	24	0.460284	0.00316167	0.594505	0.000126825	19.6405	0.649508
3	1000	No	25	0.44557	0.00350373	0.582377	0.000151015	20.3274	0.702206
3	1000	No	26	0.442127	0.00414457	0.56934	0.000124717	21.0027	0.807225
3	1000	No	27	0.42194	0.00361828	0.556621	0.000118823	21.674	0.843667
3	1000	No	28	0.419714	0.00296571	0.542272	8.88221e-05	22.3391	0.871932
3	1000	No	29	0.402996	0.00213644	0.529047	0.00011703	22.9841	0.957326
3	1000	No	30	0.396637	0.00274693	0.516897	0.000133147	23.6222	1.02254
3	1000	No	31	0.376204	0.00271776	0.504061	0.000130554	24.2606	1.10626
3	1000	No	32	0.373628	0.00226265	0.491886	0.000120385	24.8845	1.19013
3	1000	No	33	0.352466	0.00200417	0.478831	0.000140177	25.495	1.23164
3	1000	No	34	0.339913	0.000767569	0.466077	0.000134149	26.091	1.27341
3	1000	No	35	0.324339	0.00133693	0.455255	0.000116214	26.695	1.32991
3	1000	No	36	0.321076	0.00223345	0.44334	0.000109399	27.2842	1.37812
3	1000	No	37	0.305617	0.000859599	0.431781	0.000115233	27.8483	1.4161
3	1000	No	38	0.296541	0.000841267	0.420879	0.000162431	28.4222	1.40759
3	1000	No	39	0.289397	0.00117865	0.410334	0.000213662	28.9863	1.48029
3	1000	No	40	0.281216	0.00118679	0.39908	0.000252129	29.5404	1.53862
3	1000	No	41	0.267637	0.000588085	0.389374	0.000280649	30.0909	1.62913
3	1000	No	42	0.265974	0.000989305	0.379376	0.000251341	30.6194	1.68258
3	1000	No	43	0.255815	0.000836987	0.369599	0.000295918	31.1381	1.71042
3	1000	No	44	0.256621	0.000823617	0.360112	0.000287811	31.6525	1.76014
3	1000	No	45	0.251388	0.000620965	0.350623	0.000315437	32.1679	1.80967
3	1000	No	46	0.240706	0.000876259	0.341027	0.000337846	32.6958	1.84871
3	1000	No	47	0.234687	0.000649431	0.331371	0.000345781	33.1834	1.92056
3	1000	No	48	0.216443	0.000675611	0.320427	0.000345943	33.6815	1.95187
3	1000	No	49	0.211514	0.000634523	0.311386	0.000387602	34.164	2.02355
3	1000	No	50	0.206224	0.000447686	0.302115	0.000444972	34.6423	2.10006
3	1000	No	51	0.199205	0.000741264	0.293274	0.000458374	35.0964	2.14781
3	1000	No	52	0.190159	0.000616078	0.284438	0.000452936	35.5531	2.22966
3	1000	No	53	0.186069	0.000510094	0.275936	0.00046275	36.0067	2.28514
3	1000	No	54	0.179123	0.000758619	0.267479	0.000478661	36.448	2.34387
3	1000	No	55	0.17109	0.000538334	0.259357	0.000459564	36.8914	2.44167
3	1000	No	56	0.164876	0.000718931	0.251265	0.000462391	37.3131	2.52693
3	1000	No	57	0.160792	0.000798205	0.243947	0.000484328	37.7254	2.63094
3	1000	No	58	0.159949	0.000922517	0.236642	0.000511628	38.1268	2.7442
3	1000	No	59	0.150319	0.000886895	0.229538	0.000457719	38.54	2.86445
3	1000	No	60	0.145159	0.000719658	0.223681	0.000418211	38.9307	2.98794
3	1000	No	61	0.140676	0.000601548	0.217309	0.000396917	39.3118	3.08301
3	1000	No	62	0.139609	0.000793618	0.210768	0.000357909	39.6955	3.15352
3	1000	No	63	0.132888	0.000531461	0.204327	0.000362976	40.0709	3.26486
3	1000	No	64	0.127126	0.000530413	0.198122	0.000315405	40.4358	3.35368
3	1000	No	65	0.121321	0.000267926	0.191758	0.000277009	40.7951	3.44333
3	1000	No	66	0.115761	0.000370098	0.186708	0.000283532	41.1537	3.51545
3	1000	No	67	0.117918	0.000338631	0.181952	0.000274587	41.4926	3.53542
3	1000	No	68	0.109495	0.00041503	0.176823	0.000274068	41.8395	3.57122
3	1000	No	69	0.107645	0.000270135	0.172028	0.000264516	42.1608	3.61035
3	1000	No	70	0.102916	0.000147525	0.167493	0.000265193	42.4854	3.64943
3	1000	No	71	0.0972022	0.000164935	0.162218	0.000254006	42.8116	3.67516
3	1000	No	72	0.0937195	0.00024573	0.157143	0.000233913	43.1271	3.7075
3	1000	No	73	0.0907031	0.000129374	0.152507	0.000241543	43.4326	3.76636
3	1000	No	74	0.0881693	0.000190668	0.148031	0.00023656	43.7281	3.84232
3	1000	No	75	0.0814227	0.000102778	0.143448	0.000248765	44.0316	3.87136
3	1000	No	76	0.0813035	8.50663e-05	0.139811	0.000245798	44.3157	3.90862
3	1000	No	77	0.0778363	0.000177199	0.13505	0.000256193	44.6133	3.93951
3	1000	No	78	0.0767874	0.000198122	0.130466	0.000271525	44.9005	4.02497
3	1000	No	79	0.0737208	0.000186798	0.126258	0.000266	45.1784	4.12882
3	1000	No	80	0.0745092	0.000215262	0.12278	0.00028487	45.4512	4.22886
3	1000	No	81	0.0687166	0.000155999	0.118468	0.000258952	45.7307	4.30896
3	1000	Yes	1	1	0	1	0	0	0
3	1000	Yes	2	1.01259	0.00177928	0.98083	1.29051e-05	1.0048	0.00150437
3	1000	Yes	3	0.981709	0.00178658	0.962858	1.73676e-05	1.98868	0.00533366
3	1000	Yes	4	0.934794	0.0055983	0.945101	6.82928e-05	2.99217	0.00644945
3	1000	Yes	5	0.92377	0.00337251	0.923799	9.50856e-05	3.98588	0.0179727
3	1000	Yes	6	0.867758	0.0053246	0.903621	0.000155998	4.96189	0.0234859
3	1000	Yes	7	0.836628	0.00351083	0.88409	0.000189897	5.92892	0.0321818
3	1000	Yes	8	0.813649	0.00509982	0.863647	0.000210942	6.88425	0.0418205
3	1000	Yes	9	0.781084	0.00399247	0.844325	0.000249455	7.80566	0.0483932
3	1000	Yes	10	0.753268	0.0042242	0.827173	0.000256921	8.68758	0.0610472
3	1000	Yes	11	0.732094	0.00407373	0.80799	0.000377804	9.57079	0.0770611
3	1000	Yes	12	0.72056	0.00536445	0.790235	0.000520977	10.4512	0.0781413
3	1000	Yes	13	0.693819	0.00299055	0.770849	0.000568576	11.3262	0.0839322
3	1000	Yes	14	0.657289	0.00151934	0.751307	0.000742513	12.1919	0.0926302
3	1000	Yes	15	0.638775	0.00497064	0.733328	0.000779869	13.0019	0.101281
3	1000	Yes	16	0.606277	0.0067339	0.714092	0.00088607	13.8176	0.126917
3	1000	Yes	17	0.602831	0.0063867	0.695445	0.000940867	14.6205	0.151301
3	1000	Yes	18	0.574508	0.00636742	0.680165	0.00090331	15.3944	0.204022
3	1000	Yes	19	0.537318	0.00765669	0.663174	0.000906391	16.1801	0.239102
3	1000	Yes	20	0.526334	0.00541938	0.64721	0.000976204	16.9219	0.265599
3	1000	Yes	21	0.508831	0.00520163	0.630635	0.000966097	17.6619	0.29054
3	1000	Yes	22	0.489517	0.00624574	0.615473	0.000933358	18.3839	0.359395
3	1000	Yes	23	0.465684	0.00679488	0.601441	0.00100255	19.0911	0.407227
3	1000	Yes	24	0.437597	0.00715867	0.58766	0.000979464	19.7865	0.453162
3	1000	Yes	25	0.440821	0.00395855	0.573972	0.000917512	20.4576	0.519397
3	1000	Yes	26	0.439589	0.00436781	0.560244	0.000920416	21.114	0.568765
3	1000	Yes	27	0.422296	0.00406695	0.54661	0.000932887	21.7893	0.660973
3	1000	Yes	28	0.405931	0.00336978	0.53385	0.000924398	22.4438	0.726451
3	1000	Yes	29	0.395836	0.00267564	0.520181	0.000923795	23.1057	0.809089
3	1000	Yes	30	0.37414	0.0029486	0.506551	0.000870428	23.7454	0.848554
3	1000	Yes	31	0.35635	0.00213922	0.493114	0.000853599	24.3854	0.909598
3	1000	Yes	32	0.356735	0.00199578	0.478771	0.000876034	24.9994	1.00144
3	1000	Yes	33	0.333051	0.00185356	0.465352	0.000927607	25.6209	1.08063
3	1000	Yes	34	0.323647	0.00220768	0.454247	0.000810588	26.202	1.16999
3	1000	Yes	35	0.316436	0.00268209	0.442846	0.000787038	26.784	1.26637
3	1000	Yes	36	0.298084	0.00173874	0.430055	0.000759803	27.3573	1.36813
3	1000	Yes	37	0.291638	0.00176286	0.418595	0.000689859	27.9157	1.43691
3	1000	Yes	38	0.277924	0.000796745	0.407332	0.000595201	28.461	1.49041
3	1000	Yes	39	0.26861	0.00106296	0.395883	0.000571394	29.0014	1.55702
3	1000	Yes	40	0.253489	0.000897815	0.3858	0.000536475	29.5093	1.61901
3	1000	Yes	41	0.247281	0.000773271	0.375074	0.000473365	30.0469	1.71156
3	1000	Yes	42	0.239657	0.000968964	0.365472	0.000453217	30.5553	1.75953
3	1000	Yes	43	0.22979	0.000899701	0.355672	0.000434989	31.064	1.81453
3	1000	Yes	44	0.222281	0.000883352	0.346093	0.000426682	31.5469	1.86666
3	1000	Yes	45	0.21335	0.00069959	0.337106	0.000417304	32.0078	1.93791
3	1000	Yes	46	0.204655	0.000959437	0.328167	0.000377955	32.4732	1.974
3	1000	Yes	47	0.196606	0.00100822	0.320105	0.000360588	32.9234	2.05456
3	1000	Yes	48	0.189064	0.000625897	0.311442	0.000366116	33.3678	2.12339
3	1000	Yes	49	0.187402	0.000606038	0.304026	0.000363277	33.8027	2.19376
3	1000	Yes	50	0.179293	0.000739285	0.295608	0.000386131	34.2385	2.25067
3	1000	Yes	51	0.171972	0.000511475	0.287729	0.000402675	34.6684	2.29748
3	1000	Yes	52	0.167219	0.000423957	0.279756	0.000403118	35.0952	2.35462
3	1000	Yes	53	0.162516	0.000576182	0.272001	0.000409746	35.5069	2.39317
3	1000	Yes	54	0.154321	0.000569422	0.265146	0.000421814	35.9138	2.45041
3	1000	Yes	55	0.149528	0.00073131	0.258242	0.000441286	36.3168	2.53057
3	1000	Yes	56	0.147345	0.000642448	0.251496	0.000400202	36.7075	2.6117
3	1000	Yes	57	0.139724	0.00061214	0.244479	0.000386642	37.0927	2.68581
3	1000	Yes	58	0.134184	0.000428724	0.238344	0.000411713	37.4638	2.73078
3	1000	Yes	59	0.132969	0.000602537	0.231558	0.000399394	37.8346	2.76845
3	1000	Yes	60	0.126931	0.000482073	0.224961	0.000408449	38.2053	2.84992
3	1000	Yes	61	0.122264	0.000440538	0.218036	0.000404486	38.5597	2.9428
3	1000	Yes	62	0.11806	0.000598577	0.212528	0.000381318	38.9138	2.99577
3	1000	Yes	63	0.111848	0.000411227	0.206491	0.000374534	39.2611	3.07569
3	1000	Yes	64	0.10733	0.000455511	0.199967	0.00036173	39.6073	3.15776
3	1000	Yes	65	0.104155	0.000547123	0.193865	0.000314783	39.9402	3.23158
3	1000	Yes	66	0.0997388	0.000483112	0.188405	0.000315055	40.267	3.31761
3	1000	Yes	67	0.0935651	0.00040998	0.182745	0.000302559	40.5905	3.4461
3	1000	Yes	68	0.0911865	0.000378952	0.177653	0.000278632	40.9035	3.5415
3	1000	Yes	69	0.0864654	0.000299438	0.171755	0.000275735	41.2068	3.65483
3	1000	Yes	70	0.086109	0.000286541	0.166807	0.000271932	41.5019	3.71504
3	1000	Yes	71	0.0812982	0.000163594	0.16132	0.000262412	41.8053	3.80457
3	1000	Yes	72	0.0748514	0.000154171	0.155851	0.000277786	42.0886	3.89032
3	1000	Yes	73	0.0697638	0.000159096	0.151882	0.000266425	42.3677	3.96322
3	1000	Yes	74	0.069481	0.000149456	0.146773	0.000244135	42.6359	4.05493
3	1000	Yes	75	0.0657575	0.000119599	0.141231	0.000217271	42.9023	4.12736
3	1000	Yes	76	0.0606128	7.33943e-05	0.13654	0.000195844	43.1668	4.21965
3	1000	Yes	77	0.0587896	0.000108181	0.131661	0.000178249	43.4198	4.28996
3	1000	Yes	78	0.0550926	9.65588e-05	0.126645	0.000170654	43.668	4.35485
3	1000	Yes	79	0.0524937	8.48456e-05	0.122603	0.000170115	43.902	4.44745
3	1000	Yes	80	0.0507442	0.000103089	0.117777	0.000155038	44.1351	4.53243
3	1000	Yes	81	0.0479989	0.000134772	0.113316	0.000137382	44.3522	4.63553
